# Supplementary material for: Social burden of people with the migraine diagnosis in Japan: evidence from a population-based cross-sectional survey
Source: PubMed Central journal article supplement — BMJ Open. 2020 Nov 9;10(11):e038987. doi: 10.1136/bmjopen-2020-038987 (PMC7654137; doi:10.1136/bmjopen-2020-038987), 2020-11-09
Supplement: bmjopen-2020-038987.draft_revisions.pdf [file bmjopen-2020-038987.draft_revisions.pdf]

# BMJ Open

BMJ Open is committed to open peer review. As part of this commitment we make the peer review history of every article we publish publicly available.

When an article is published we post the peer reviewers' comments and the authors' responses online. We also post the versions of the paper that were used during peer review. These are the versions that the peer review comments apply to.

The versions of the paper that follow are the versions that were submitted during the peer review process. They are not the versions of record or the final published versions. They should not be cited or distributed as the published version of this manuscript.

BMJ Open is an open access journal and the full, final, typeset and author-corrected version of record of the manuscript is available on our site with no access controls, subscription charges or pay-per-view fees (<http://bmjopen.bmj.com>).

If you have any questions on BMJ Open's open peer review process please email [info.bmjopen@bmj.com](mailto:info.bmjopen@bmj.com)

# BMJ Open

## The social burden of people with the migraine diagnosis in Japan: evidence from a population-based cross-sectional survey

|                               |                                                                                                                                                                                                                                                                                                                                                                |
|-------------------------------|----------------------------------------------------------------------------------------------------------------------------------------------------------------------------------------------------------------------------------------------------------------------------------------------------------------------------------------------------------------|
| Journal:                      | <i>BMJ Open</i>                                                                                                                                                                                                                                                                                                                                                |
| Manuscript ID                 | bmjopen-2020-038987                                                                                                                                                                                                                                                                                                                                            |
| Article Type:                 | Original research                                                                                                                                                                                                                                                                                                                                              |
| Date Submitted by the Author: | 31-Mar-2020                                                                                                                                                                                                                                                                                                                                                    |
| Complete List of Authors:     | Igarashi, Hisaka; Fujitsu Clinic, Headache Care Unit, Department of Internal Medicine,<br>Ueda, Kaname; Eli Lilly Japan KK,<br>Jung, Sungeun; Kantar, Health Division<br>Cai, Zhihong; Eli Lilly Japan KK, Medicines Development Unit Japan<br>Chen, Yirong; Kantar, Health Division<br>Nakamura, Tonomi; Eli Lilly Japan KK, Medicines Development Unit Japan |
| Keywords:                     | Migraine < NEUROLOGY, PUBLIC HEALTH, HEALTH ECONOMICS                                                                                                                                                                                                                                                                                                          |
|                               |                                                                                                                                                                                                                                                                                                                                                                |

SCHOLARONE™  
Manuscripts

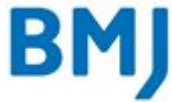

I, the Submitting Author has the right to grant and does grant on behalf of all authors of the Work (as defined in the below author licence), an exclusive licence and/or a non-exclusive licence for contributions from authors who are: i) UK Crown employees; ii) where BMJ has agreed a CC-BY licence shall apply, and/or iii) in accordance with the terms applicable for US Federal Government officers or employees acting as part of their official duties; on a worldwide, perpetual, irrevocable, royalty-free basis to BMJ Publishing Group Ltd ("BMJ") its licensees and where the relevant Journal is co-owned by BMJ to the co-owners of the Journal, to publish the Work in this journal and any other BMJ products and to exploit all rights, as set out in our [licence](#).

The Submitting Author accepts and understands that any supply made under these terms is made by BMJ to the Submitting Author unless you are acting as an employee on behalf of your employer or a postgraduate student of an affiliated institution which is paying any applicable article publishing charge ("APC") for Open Access articles. Where the Submitting Author wishes to make the Work available on an Open Access basis (and intends to pay the relevant APC), the terms of reuse of such Open Access shall be governed by a Creative Commons licence – details of these licences and which [Creative Commons](#) licence will apply to this Work are set out in our licence referred to above.

Other than as permitted in any relevant BMJ Author's Self Archiving Policies, I confirm this Work has not been accepted for publication elsewhere, is not being considered for publication elsewhere and does not duplicate material already published. I confirm all authors consent to publication of this Work and authorise the granting of this licence.

1  
2  
3 **Title: The social burden of people with the migraine diagnosis in Japan:**  
4 **evidence from a population-based cross-sectional survey**  
5  
6  
7

8 **Authors:** Hisaka Igarashi<sup>1</sup>, Kaname Ueda<sup>2</sup>, Sungeun Jung<sup>3</sup>, Zhihong Cai<sup>2</sup>, Yirong Chen<sup>4</sup>,  
9 Tomomi Nakamura<sup>2</sup>  
10  
11

12  
13  
14 **Author affiliations:**

15  
16 <sup>1</sup> Headache Care Unit, Department of Internal Medicine, Fujitsu Clinic, Kawasaki, Japan

17 <sup>2</sup> Medicines Development Unit Japan, Eli Lilly Japan K.K., Kobe, Japan

18 <sup>3</sup> Kantar, Health Division, Seoul, South Korea

19 <sup>4</sup> Kantar, Health Division, Singapore  
20  
21  
22

23 **Corresponding author:**

24 Kaname Ueda

25 Research Scientist

26 Medicines Development Unit Japan

27 Eli Lilly Japan K.K.

28 5-1-28 Isogamidori,

29 Chuo-ku, Kobe 651-0086 Japan

30 Tel: 81-78-242-9519

31 Fax: 81-78-242-9939

32 Email: [ueda\\_kaname@lilly.com](mailto:ueda_kaname@lilly.com)  
33  
34  
35  
36  
37  
38  
39  
40

41 **Word count: 3458** (Limit 4000, excluding title page, abstract, references, figures and tables)  
42  
43  
44  
45  
46  
47  
48  
49  
50  
51  
52  
53  
54  
55  
56  
57  
58  
59  
60

**ABSTRACT (max. 300 words, current 291 words)**

**Objectives** To quantify the social burden among Japanese migraine patients in the context of currently available migraine treatments, by comparison with non-migraine controls, and comparison of migraine patients currently taking prescription medication vs. not taking prescription medication.

**Design** Cross-sectional analysis.

**Setting** Data from the population-based online self-administered Japan National Health and Wellness Survey (NHWS) 2017.

**Participants** Respondents to the NHWS (N=30,001) were  $\geq 18$  years. Migraine patients were respondents with self-reported experience and physician diagnosis of migraine. Non-migraine controls reported no migraine experience. Migraine patients were sub-grouped into currently taking prescription medication for migraine (Rx) and currently not taking prescription medication (non-Rx).

**Methods** One-way ANOVA tests were performed to compare health-related quality of life (HRQoL), work productivity and activity impairment and healthcare resource utilization between migraine patients and matched non-migraine controls selected by 1:1 propensity score matching. Generalized linear models were used to compare outcomes and migraine related characteristics between Rx and non-Rx.

**Results** Compared to matched controls, migraine patients (N=1,265) had significantly lower HRQoL in terms of lower Physical Component Summary (48.36 vs. 51.29,  $p < 0.001$ ), Mental Component Summary (44.65 vs. 48.31,  $p < 0.001$ ), Role/Social Component Summary (41.78 vs. 46.18,  $p < 0.001$ ) and mean EuroQol 5-Dimension index (0.77 vs. 0.86,  $p < 0.001$ ) scores. Migraine patients experienced significantly higher absenteeism (6.95% vs. 3.07%,  $p < 0.001$ ), presenteeism (32.73% vs. 18.94%,  $p < 0.001$ ), work productivity loss (34.82% vs. 20.03%,  $p < 0.001$ ) and daily activity impairment (35.70% vs. 22.04%,  $p < 0.001$ ) and visited healthcare professionals more often (8.38 vs. 4.57,  $p < 0.001$ ) than controls. No significant differences in these outcomes were found when comparing Rx (N=587) and non-Rx (N=678) patients.

**Conclusions** There is an unmet need for improved HRQoL and work productivity in Japanese migraine patients despite the currently available prescription medications, which are important factors to consider for future development of migraine therapies.

## STRENGTHS AND LIMITATIONS

- The recruitment of respondents to the Japan 2017 NHWS utilized a stratified random sampling procedure with strata by sex and age according to national census data, thereby ensuring that the demographic composition of the sample was representative of the adult population in Japan.
- This study used the validated instruments Short Form-12 version 2, EuroQol-5 Dimension, Work Productivity and Activity Impairment questionnaire to quantify the burden of migraine and Headache Impact Test for assessment of headache-related disability.
- The data from NHWS is cross-sectional and no causal relationships can be assumed.
- As all data are self-reported, no verification of patient reported outcomes was conducted, and data is subject to recall bias.
- Although NHWS is broadly representative of the Japanese adult population, it is unclear the extent to which the migraine patients and migraine patients taking Rx are representative of the larger population.

## INTRODUCTION

Migraine is a common disabling headache disorder, known to impose a burden on both patients and societies worldwide[1,2]. Since 1990, migraine has been the second leading cause of years lived with disability (YLD) and the sixth most prevalent disease[3]. Globally the prevalence of migraine has been estimated to be 11.6%, and in Asia 10.1%[4]. In Japan, the prevalence has been estimated to be between 6.0 - 8.9%[5–7].

A recent study of European migraine patients showed that suffering from more than 3 monthly headache days (MHD) was associated with poorer health related quality of life (HRQoL), high healthcare resource utilizations (HCRU) and loss of work productivity compared to non-migraine controls[1]. In Japan, previous studies have also reported an incremental impact of migraine on patients' social life and work. In a nationwide survey from 1997, 30% of migraine patients reported a severe impairment of their daily activities where bed rest was frequently required. Furthermore, 32% of migraine patients reported moderate to severe impairment in social activities including cancellation of work and daily appointments[5]. Similarly, in the regional Daisen study from 1999, 20.3% of migraine patients reported that they had experienced time or days off from work and 27.3% reported being unable to do housework[6]. The general health perception was worse compared to non-headache subjects, as migraine patients more often reported their health as “poor” and half of the patients suffered from sleep disturbance[6]. Despite the disabling impact of migraine, both surveys revealed large populations of underdiagnosed and undertreated migraine patients. More than 60% of patients had never consulted a physician for headache, as few as 5%–7% of patients continuously consulted a physician for migraine[5,6], and only 11.6% of patients were aware that their headache was migraine[5,6]. Further studies have investigated the impact of migraine on the active Japanese workforce, which found that 22.4% of migraineurs had missed work due to headaches several times in the past year[7].

1  
2  
3 Additionally, migraine and headaches were the leading cause of absence from work  
4 (absenteeism) for employed women in their 50s (6.2 days of absence, 4 weeks recall period),  
5  
6 and the leading cause of not being able to fully perform while at work (presenteeism) for  
7  
8 employed men in their 20s with 49.5 hours lost in the last 4 weeks[8].  
9  
10

11  
12 With these most recent studies of migraine burden performed in 2008[7] and 2013[8], there  
13  
14 has been a paucity in research and there is a need for updated data to gain further insights and  
15  
16 understand the current burden of migraine in Japan, in the context of currently available  
17  
18 treatments. Therefore, the objective of this study was to quantify the migraine associated  
19  
20 burden by comparison of HRQoL, work productivity and activity impairment (WPAI) and  
21  
22 HCRU in migraine patients and people without migraine experience, and among the treated  
23  
24 migraine population vs. non-treated migraine population.  
25  
26  
27  
28  
29  
30  
31

## 32 **METHODS**

33  
34 This research was a cross-sectional study using data from the National Health and Wellness  
35  
36 Survey (NHWS) conducted in 2017. NHWS is an online self-administered survey and was  
37  
38 granted exemption status upon review by Pearl International Review Board (Indianapolis,  
39  
40 IN). All respondents provided informed consent prior to participating.  
41  
42  
43  
44  
45  
46

### 47 **Study population**

48  
49 Respondents to the NHWS were aged 18 years or older and were recruited from web-based  
50  
51 opt-in consumer panels. Respondents were already members of these panels, recruited  
52  
53 through opt-in emails, co-registration with panel partners, newsletter campaigns, banner  
54  
55 placements and had provided informed consent prior to participation. Recruitment of NHWS  
56  
57 respondents utilized a stratified random sampling procedure, with strata by sex and age  
58  
59  
60



1  
2  
3 according to census data from the US census database which sources from the Japan Ministry  
4 of Internal Affairs & Communications[9], which was implemented to ensure that the  
5 demographic composition of the sample was representative of the Japan adult population.  
6  
7 Representation of NHWS data has been validated and weighted against reliable sources  
8 including government agencies' health statistics and unaffiliated third parties[10,11].  
9  
10 Respondents who self-reported a physician diagnosis of migraine were included in the  
11 migraine patient group. Those who self-reported no experience of migraine were the non-  
12 migraine controls. Respondents with self-reported physician diagnosis of migraine were  
13 further sub-grouped into patients who reported currently taking prescription medication for  
14 migraine (Rx) and patients currently not taking any prescription medication (non-Rx).  
15  
16  
17  
18  
19  
20  
21  
22  
23  
24  
25  
26  
27  
28

### 29 **Patient involvement**

30  
31  
32 Patients and respondents to NHWS were not involved in setting the research questions,  
33 outcomes measures nor the design of the study. The data used in this study were obtained  
34 from patients and respondents who provided self-reported information in the NHWS.  
35  
36  
37  
38  
39  
40  
41  
42

### 43 **Measures**

#### 44 *Covariates*

45  
46  
47 The demographic and general health characteristics included: gender, age, marital status,  
48 number of children living in the household, household income, employment status, smoking  
49 status, alcohol use, exercise behaviour and Charlson Comorbidity Index (CCI)[12–14].  
50  
51  
52  
53  
54  
55  
56  
57  
58  
59  
60

### *Measures*

HRQoL was assessed by the Short Form-12 health survey version 2 (SF-12v2)[15], which consists of 12 questions with summary scores that was translated and validated for use in the Japanese population[16,17]. The mental component summary score (MCS), physical component summary score (PCS) and role/social component summary (RCS) were calculated based on survey responses. Each domain and summary score was calculated using a norm-based scoring algorithm which allows for all measures to be viewed together on the same graph and allows for scores to be interpreted relative to population means. Higher scores indicate better quality of life.

Health state utilities were quantified with the EuroQol 5-Dimension 5 Levels (EQ-5D 5L) instrument, which is a standardized measure of health status to provide a simple, generic measure of health[18]. EQ-5D index score is a single summary index derived from the EQ-5D 5L questions[19], scored by using the Japanese tariff. Higher scores indicate better health status. In addition, the EuroQol visual analogue scale (EQ VAS) was used which records the patient's self-rated health on a 100mm VAS, where the endpoints are labelled 'The best health you can imagine' (100) and 'The worst health you can imagine' (0). The VAS can be used as a quantitative measure of health outcome that reflect the patient's own judgement.

For work productivity assessment, the Work Productivity and Activity Impairment (WPAI) questionnaire[20] was used to measure the impact of health on both employment-related and daily activities. This six-item validated instrument consists of four metrics: absenteeism (the percentage of work time missed because of one's health in the past 7 days), presenteeism (the percentage of impairment experienced because of one's health while at work in the past 7 days), overall work productivity loss (an overall impairment estimate that is a combination of absenteeism and presenteeism), and daily activity impairment (the percentage of impairment in daily activities because of one's health in the past 7 days). These four subscales are

1  
2  
3 generated in the form of percentages, with higher values indicating greater impairment. Only  
4 respondents who reported being full-time, part-time, or self-employed provide data for  
5  
6 absenteeism, presenteeism, and overall work impairment. All respondents provide data for  
7  
8 activity impairment.  
9  
10

11  
12 HCRU was considered in terms of the number of outpatient visits in the past 6 months to  
13  
14 healthcare providers (practitioner/family practitioners, internists, and dentists as well as more  
15  
16 specialized physicians), the emergency room (ER), and the hospitalization for the  
17  
18 participant's own medical condition.  
19

20  
21 Respondents with migraine utilized the validated Headache Impact Test (HIT-6) scale for  
22  
23 assessment of headache-related disability[21]. Scores from HIT-6 range from 36 to 78. A  
24  
25 higher HIT-6 score indicates a greater impact of headache on the daily life of respondents.  
26  
27  
28  
29

### 30 31 *Migraine-specific characteristics and treatment*

32  
33 All migraine patients were asked several questions in relation to their migraine including the  
34  
35 symptoms experienced due to migraine, number of years experiencing migraine, diagnosing  
36  
37 physician, number of migraines in the past 30 days and in the past 6 months, number of  
38  
39 headache days in the past 30 days, experienced migraine related to menstrual cycle, days of  
40  
41 missed work due to migraine in the past 6 months, days of missed household activities due to  
42  
43 migraine in the past 6 months, current use of prescription medication (Rx) to treat or prevent  
44  
45 migraine, and usage of over-the-counter (OTC) or herbal products to treat migraine.  
46  
47

48  
49 Respondents specified the type of Rx which included the following drug classes: triptan,  
50  
51 anticonvulsant, beta blocker, non-steroidal anti-inflammatory drugs (NSAIDs) and others.  
52

53  
54 The top 10 self-reported OTC and herbal products contained the following active ingredients:  
55  
56 loxoprofen, aspirin, ibuprofen, acetaminophen, chondroitin, and ergotamine. In addition,  
57  
58  
59  
60

1  
2  
3 respondents with migraine answered the validated HIT-6 scale for assessment of headache-  
4 related disability[21].  
5  
6  
7  
8  
9

## 10 **Statistical analysis**

11  
12  
13 Demographic factors and general health characteristics were compared between migraine  
14 patients and non-migraine controls to understand the baseline differences in the two groups.

15 Demographic factors, general health characteristics, and migraine-specific variables were  
16 summarized descriptively among migraine patients. Age, CCI, gender, employment status,  
17 household income, smoking status, and alcohol use were used in the 1:1 propensity score  
18 matching using a greedy matching algorithm to form the matched non-migraine control  
19 group. Post-matching bivariate comparisons were conducted between migraine patients and  
20 matched non-migraine respondents to assess the balance of the matching. After propensity  
21 score matching, outcomes were compared between patients with migraine and matched non-  
22 migraine controls. One-way ANOVA tests were used for comparison of these continuous  
23 outcome variables.  
24  
25  
26  
27  
28  
29  
30  
31  
32  
33  
34  
35  
36  
37

38 Demographic factors, general health characteristics, migraine-specific variables (including  
39 migraine-related symptoms) were also compared between migraine patients currently taking  
40 Rx and not currently taking Rx, using chi-square test for categorical variables and one-way  
41 analyses of variance (ANOVA) for continuous variables. Generalized linear models (GLMs)  
42 were used to compare the outcomes between migraine patients currently taking Rx and  
43 migraine patients currently not taking Rx, accounting for demographic and clinical  
44 characteristics of the patients. Normal distribution with identity link were specified in the  
45 GLMs for normally distributed outcomes, such as HRQoL scores. Negative binomial  
46 distribution with log link were specified for outcomes with skewed distributions, such as  
47 WPAI and HCRU. Estimated adjusted means and p-values were reported for each health  
48  
49  
50  
51  
52  
53  
54  
55  
56  
57  
58  
59  
60

1  
2  
3 outcome. All outcome variables were pre-determined before the analyses and the analyses  
4 were not of exploratory manner. No correction for multiple testing was conducted for this  
5 study. Complete data were available, and no imputation was carried out. For all analyses,  
6 statistical significance was assessed at a significance level of 0.05. All data analyses were  
7 performed using IBM SPSS Statistics Version 22[22] and R Version 3.4.4[23].  
8  
9  
10  
11  
12  
13  
14  
15  
16  
17

## 18 **RESULTS**

19  
20 A total of 25,209 respondents without self-reported experience with migraine were included  
21 in the non-migraine group and 4,792 respondents self-reported experience with migraine  
22 (Figure 1). Among the 4,792 respondents who self-reported experience with migraine, 74%  
23 (n=3,527) had never been diagnosed by a physician. The 1,265 respondents with self-reported  
24 physician diagnosed migraine were included in the migraine patient group for the further  
25 analyses.  
26  
27  
28  
29  
30  
31  
32  
33

34 On average, migraine patients tend to be younger than non-migraine respondents (43.8 vs.  
35 52.8 years,  $p < 0.001$ ) and have a significantly higher CCI index (0.24 vs. 0.17,  $p < 0.001$ )  
36 (Supplementary Table 1). More migraine patients are female (66.6% vs. 47.1%,  $p < 0.001$ ),  
37 currently employed (59.8% vs. 54.7%,  $p < 0.001$ ) and have children in the household (27.7%  
38 vs. 18.6%  $p < 0.001$ ). Compared to controls, fewer migraine patients are married/living with  
39 partner (53.1% vs. 62.5%,  $p < 0.001$ ) and have completed university (42.5% vs. 49.2%,  $p <$   
40 0.001). Migraine patients have similar household income to non-migraine respondents. A  
41 slightly higher percentage of migraine patients currently smoke (44.0% vs. 41.2%,  $p=0.046$ )  
42 compared to non-migraine respondents, but slightly fewer migraine patients currently  
43 consume alcohol (63.2% vs. 66.2%,  $p=0.031$ ). Detailed results are listed in Supplementary  
44 Table 1.  
45  
46  
47  
48  
49  
50  
51  
52  
53  
54  
55  
56  
57  
58  
59  
60

## Comparison of outcomes in migraine patients vs. matched non-migraine controls

After 1:1 propensity score matching, the majority of demographic and clinical characteristics were balanced between migraine patients and matched non-migraine controls (Supplementary Table 1). Bivariate comparison between matched non-migraine controls and migraine patients were conducted to evaluate the burden of migraine in terms of HRQoL, WPAI and HCRU (Figure 2). We found that migraine patients had significantly lower PCS (48.36 vs. 51.29,  $p<0.001$ ), MCS (44.65 vs. 48.31,  $p<0.001$ ), and RCS (41.78 vs. 46.18,  $p<0.001$ ) scores as well as significantly lower EQ-5D index (0.77 vs. 0.86,  $p<0.001$ ) and EQ-5D VAS (64.41 vs. 73.49,  $p<0.001$ ) scores. The differences in MCS and RCS between the two groups were more than 3 points, which is defined as a minimum clinically important difference (MCID)[24] (Figure 2A).

In terms of WPAI, migraine patients experienced significantly higher absenteeism (6.95% vs. 3.07%,  $p<0.001$ ), presenteeism (32.73% vs. 18.94%,  $p<0.001$ ), work productivity loss (34.82% vs. 20.03%,  $p<0.001$ ) and daily activity impairment (35.70% vs. 22.04%,  $p<0.001$ ) compared to matched controls (Figure 2B).

Compared to controls, migraine patients visited health care professionals (HCPs) almost twice as often (8.38 vs. 4.57,  $p<0.001$ ) and visited the ER 4 times as often (0.12 vs. 0.03,  $p<0.001$ ). There were no significant differences in the number of hospitalizations between the two groups (Figure 2C).

## Migraine-related health characteristics among migraine patients

On average, patients received a migraine diagnosis 11.77 years ago (standard deviation (SD) 10.84), and the majority (58.3%) were diagnosed by a primary care physician/general practitioner (GP)/internist (Table 1). On average, patients experienced migraine 4.69 times

1  
2  
3 (SD 6.22) in the past 30 days and 23.36 times (SD 33.72) in the past 6 months. In the past 30  
4  
5 days, migraine patients had an average of 6.45 (SD 7.02) headache days. Among female  
6  
7 migraine patients, 41.4% experienced menstrual-related migraine. An average of 1.62 days of  
8  
9 work and 2.94 days of household activities were missed due to migraine in the past 6 months.  
10  
11 Among all patients, the average HIT-6 score was 59.37 (SD 7.97) and more than half (57.2%)  
12  
13 of patients were severely impacted (HIT-6 score  $\geq 60$ )[21].  
14  
15

16  
17 The most common migraine-related symptom was pulsating, throbbing, or pounding pain  
18  
19 (66.9%), followed by “pain being worse on one side of your head or occurs on one side of  
20  
21 your head only” (54.8%), moderate to severe pain (39.1%), nausea and/or vomiting (38.5%),  
22  
23 bothered by or unusually sensitive to light (32.3%), bothered by or unusually sensitive to  
24  
25 sound (27.9%), pain made worse by routine activities such as walking or climbing stairs  
26  
27 (26.5%), migraine lasting for at least four hours but not more than 72 hours if untreated  
28  
29 (23.0%), aura (19.1%), and seeing spots, flashing lights, or “heat waves” before or during the  
30  
31 migraine (17.5%). 4.4% of patients experienced none of the above symptoms (Figure 3).  
32  
33  
34  
35  
36  
37  
38  
39  
40  
41  
42  
43  
44  
45  
46  
47  
48  
49  
50  
51  
52  
53  
54  
55  
56  
57  
58  
59  
60

Table 1. Bivariate comparison of migraine-related health characteristics in diagnosed migraine patients and patients currently taking Rx vs. patients not currently taking Rx (non-Rx).

|                                                                                            |                                     | Diagnosed migraine patients<br>(N=1,265) |             | Non-Rx<br>(N=678) |             | Rx<br>(N=587) |             | p-value<br>Non-Rx vs. Rx |
|--------------------------------------------------------------------------------------------|-------------------------------------|------------------------------------------|-------------|-------------------|-------------|---------------|-------------|--------------------------|
|                                                                                            |                                     | Mean or %                                | [SD] or (n) | Mean or %         | [SD] or (n) | Mean or %     | [SD] or (n) |                          |
| <b>Time since migraine (years), mean [SD]*</b>                                             |                                     | 11.27                                    | [10.87]     | 11.14             | [11.20]     | 11.44         | [10.41]     | .635                     |
| <b>Diagnosing physician, % (n)*</b>                                                        | Primary Care Physician/GP/Internist | 58.3%                                    | (686)       | 60.3%             | (409)       | 55.5%         | (277)       | .181                     |
|                                                                                            | Neurologist                         | 27.2%                                    | (320)       | 25.2%             | (171)       | 29.9%         | (149)       |                          |
|                                                                                            | Other                               | 14.5%                                    | (171)       | 14.5%             | (98)        | 14.6%         | (73)        |                          |
| <b>Number of migraine in the past 30 days, mean [SD]</b>                                   |                                     | 4.69                                     | [6.22]      | 3.61              | [5.54]      | 5.95          | [6.72]      | < .001                   |
| <b>Number of migraine in the past 6 months, mean [SD]</b>                                  |                                     | 23.36                                    | [33.72]     | 17.70             | [29.13]     | 29.91         | [37.31]     | < .001                   |
| <b>Days missed work due to migraine in the past 6 months, mean [SD]</b>                    |                                     | 1.62                                     | [10.24]     | 1.39              | [9.37]      | 1.89          | [11.17]     | .384                     |
| <b>Days of household activities missed due to migraine in the past 6 months, mean [SD]</b> |                                     | 2.94                                     | [12.67]     | 1.81              | [5.70]      | 4.25          | [17.48]     | < .001                   |
| <b>Number of headache days in the past 30 days, mean [SD]</b>                              |                                     | 6.45                                     | [7.02]      | 5.12              | [5.88]      | 7.70          | [7.75]      | < .001                   |
| <b>Number of headache days in the past 30 days, % (n)</b>                                  | 0-3 MHDs                            | 49.4%                                    | (365)       | 57.3%             | (205)       | 42.0%         | (160)       | < .001                   |
|                                                                                            | 4-14 MHDs                           | 36.8%                                    | (272)       | 33.8%             | (121)       | 39.6%         | (151)       |                          |
|                                                                                            | ≥15 MHDs                            | 13.8%                                    | (102)       | 8.9%              | (32)        | 18.4%         | (70)        |                          |
|                                                                                            | Don't know                          | 24.0%                                    | (304)       | 24.4%             | (161)       | 24.0%         | (143)       |                          |
|                                                                                            | Not asked                           | 17.5%                                    | (222)       | 10.7%             | (159)       | 17.5%         | (63)        |                          |
| <b>Menstrual-related migraine (N=female only), % (n)**</b>                                 |                                     | 41.4%                                    | (349)       | 38.0%             | (167)       | 45.3%         | (182)       | .031                     |
| <b>Use of OTC/Herbal products to treat migraine, % (n)</b>                                 |                                     | 12.9%                                    | (163)       | 14.6%             | (99)        | 10.9%         | (64)        | .050                     |
| <b>Currently using Rx to treat or prevent migraine, % (n)</b>                              |                                     | 46.4%                                    | (587)       | -                 | -           | 100%          | (587)       | -                        |
| <b>Acute medication only, % (n)***</b>                                                     |                                     | 77.5%                                    | (455)       | -                 | -           | 77.5%         | (455)       |                          |
| <b>Preventive medication only, % (n)***</b>                                                |                                     | 14.3%                                    | (84)        | -                 | -           | 14.3%         | (84)        |                          |
| <b>Both, % (n)***</b>                                                                      |                                     | 8.2%                                     | (48)        | -                 | -           | 8.2%          | (48)        |                          |
| <b>HIT-6 score, mean [SD]</b>                                                              |                                     | 59.37                                    | [7.97]      | 57.76             | [8.00]      | 61.23         | [7.52]      | < .001                   |
| <b>HIT-6 impact grade, % (n)</b>                                                           | Little to no impact                 | 11.3%                                    | (143)       | 14.9%             | (101)       | 7.2%          | (42)        | < .001                   |
|                                                                                            | Moderate impact                     | 16.3%                                    | (206)       | 19.8%             | (134)       | 12.3%         | (72)        |                          |
|                                                                                            | Substantial impact                  | 15.3%                                    | (193)       | 16.4%             | (111)       | 14.0%         | (82)        |                          |
|                                                                                            | Severe impact                       | 57.2%                                    | (723)       | 49.0%             | (332)       | 66.6%         | (391)       |                          |



1  
2  
3  
4  
5  
6  
7  
8  
9  
10  
11  
12  
13  
14  
15  
16  
17  
18  
19  
20  
21  
22  
23  
24  
25  
26  
27  
28  
29  
30  
31  
32  
33  
34  
35  
36  
37  
38  
39  
40  
41  
42  
43  
44  
45  
46

Abbreviations: Rx = prescription medication, SD = standard deviation, GP = General practitioner, MHD = monthly headache days, OTC = over-the-counter medication, HIT = Headache Impact Test.

\*Sample size of diagnosed migraine patients who reported the time since diagnosis: N=1177, Non-Rx: N=678, Rx: N=499. \*\*Sample size of diagnosed migraine patients: N=842, Non-Rx: N=440, Rx: N=402. \*\*\*Sample size of diagnosed migraine patients taking Rx: N=587.

For peer review only

### Treatment use in migraine patients

Among all migraine patients, the majority (678; 53.6%) did not currently take any prescription medication (Rx) (Figure 1). 587 (46.4%) were currently taking prescription medication (Rx), whereof 77.5% currently used acute treatment, 14.3% used preventive treatments and 8.2% used both (Table 1). Of the 678 migraine patients not currently taking Rx, 384 (56.6%) had previously used a prescription medication and 294 (43.4%) had never used a prescription medication, and 50 (17.0%) of the 294 patients had been recommended a prescription medication by the physician before. Out of the total 1,265 migraine patients, only 163 patients (12.9%) had used OTC or herbal product to treat migraine and 142 patients recalled the name of the OTCs they used.

### Comparison of outcomes in Rx patients vs. non-Rx patients

There were no differences in demographic characteristics between the Rx and non-Rx group, except for marital status. Significantly fewer patients taking Rx were married or living with partner (47.0% vs. 58.4%,  $p<0.001$ ) (Table 2). In terms of migraine-related characteristics, migraine patients currently taking Rx experienced migraine significantly more often in the past 30 days (5.95 vs. 3.61,  $p<0.001$ ) and in the past 6 months (29.91 vs. 17.70,  $p<0.001$ ) compared to those not currently taking Rx (Table 1). More days of household activities (4.25 vs. 1.81,  $p<0.001$ ) were missed due to migraine among patients currently taking Rx and a significantly higher percentage of patients had  $\geq 15$  MHD (18.4% vs. 8.9%,  $p<0.001$ ) (Table 1). A significantly higher average HIT-6 score (61.23 vs. 57.76,  $p<0.001$ ) was observed among migraine patients currently taking Rx and a higher percentage were determined to have severe impact (66.6% vs. 49.0%,  $p<0.001$ ) (Table 1).

Without adjustment, the bivariate comparisons of outcomes in Rx vs. non-Rx showed that migraine patients currently taking Rx had a lower MCS, higher daily activity impairment and

1  
2  
3 increased number of visits to physicians in the past 6 months. No other differences in  
4  
5 outcomes were observed (Supplementary Table 2).  
6

7  
8 After adjusting for potential confounding effects (age, CCI, gender, marital status, currently  
9  
10 employed and number of migraines in the past 30 days), no significant differences in  
11  
12 HRQoL, WPAI or HCRU were found between the two groups (Figure 2 D-F).  
13  
14  
15  
16  
17  
18  
19  
20  
21  
22  
23  
24  
25  
26  
27  
28  
29  
30  
31  
32  
33  
34  
35  
36  
37  
38  
39  
40  
41  
42  
43  
44  
45  
46  
47  
48  
49  
50  
51  
52  
53  
54  
55  
56  
57  
58  
59  
60

For peer review only

Table 2. Bivariate comparison of demographics and general health characteristics in diagnosed migraine patients and patients currently taking Rx vs. patients not currently taking Rx (non-Rx).

|                                                       |                                | Diagnosed migraine patients<br>(N=1,265) |             | Non-Rx<br>(N=678) |             | Rx<br>(N=587) |             | p-value<br>No Rx vs.<br>Rx |
|-------------------------------------------------------|--------------------------------|------------------------------------------|-------------|-------------------|-------------|---------------|-------------|----------------------------|
|                                                       |                                | Mean or %                                | [SD] or (n) | Mean or %         | [SD] or (n) | Mean or %     | [SD] or (n) |                            |
| <b>Age, mean [SD]</b>                                 |                                | 43.79                                    | [14.27]     | 44.06             | [14.82]     | 43.47         | [13.61]     | .463                       |
| <b>Gender, % (n)</b>                                  | Female                         | 66.6%                                    | (842)       | 64.9%             | (440)       | 68.5%         | (402)       | .177                       |
| <b>Marital status, % (n)</b>                          | Married or living with partner | 53.1%                                    | (672)       | 58.4%             | (396)       | 47.0%         | (276)       | < .001                     |
| <b>Having children &lt;18 in the household, % (n)</b> | Yes                            | 27.7%                                    | (351)       | 27.7%             | (188)       | 27.8%         | (163)       | .987                       |
| <b>Employment status, % (n)</b>                       | Currently employed             | 59.8%                                    | (756)       | 60.0%             | (407)       | 59.5%         | (349)       | .835                       |
| <b>Household income, % (n)</b>                        | <¥3,000,000                    | 18.7%                                    | (237)       | 18.4%             | (125)       | 19.1%         | (112)       | .318                       |
|                                                       | ¥3,000,000 to <¥5,000,000      | 25.0%                                    | (316)       | 24.2%             | (164)       | 25.9%         | (152)       |                            |
|                                                       | ¥5,000,000 to <¥8,000,000      | 24.6%                                    | (311)       | 26.0%             | (176)       | 23.0%         | (135)       |                            |
|                                                       | ¥8,000,000 or more             | 17.0%                                    | (215)       | 18.1%             | (123)       | 15.7%         | (92)        |                            |
|                                                       | decline to answer              | 14.7%                                    | (186)       | 13.3%             | (90)        | 16.4%         | (96)        |                            |
| <b>CCI, mean [SD]</b>                                 |                                | 0.24                                     | [1.00]      | 0.19              | [0.60]      | 0.29          | [1.32]      | .072                       |
| <b>Currently smoking, % (n)</b>                       | Yes                            | 44.0%                                    | (557)       | 43.8%             | (297)       | 44.3%         | (260)       | .862                       |
| <b>Currently use alcohol, % (n)</b>                   | Yes                            | 63.2%                                    | (800)       | 64.9%             | (440)       | 61.3%         | (360)       | .189                       |
| <b>Currently exercise, % (n)</b>                      | Yes                            | 44.3%                                    | (561)       | 43.4%             | (294)       | 45.5%         | (267)       | .449                       |

Abbreviations: CCI = Charlson Comorbidity Index, Rx = prescribed medication

## DISCUSSION

In this study we found that migraine patients in Japan experience a significant burden of illness compared to matched controls without migraine in terms of lower HRQoL, higher WPAI and HCRU (Figure 2), and 88.8% of patients reported that migraine had a moderate to severe impact on their daily life (HIT-6 score) (Table 1). Compared to matched controls, migraine patients had 2.93 points decreased PCS ( $p<0.001$ ) and more than 3 points decreased MCS (3.66 points,  $p<0.001$ ) and RCS (4.40 points,  $p<0.001$ ) (Figure 2), which indicates that migraine has a clinically significant impact on migraine patients' mental health and role/social functioning. In comparison, similarly lower MCS scores have been reported in Japanese patients with arthritis (-3.4 points) and ischemic heart disease (-4.1) compared to controls, and similarly lower PCS scores were reported in patients with diabetes (-3.0 point), chronic lung disease (-3.1 point) and ischemic heart disease (-2.6 points)[25].

In addition to lower HRQoL, we observed that migraine patients who were currently employed had higher levels of work productivity loss compared to matched non-migraine controls, with 2.2-fold higher absenteeism ( $p<0.001$ ), 1.7-fold higher presenteeism ( $p<0.001$ ) and 1.7-fold higher work productivity loss ( $p<0.001$ ) (Figure 2). The actual work loss that Japanese migraine patients experience was thereby quantified based on the validated WPAI tool[20], and supports the previous findings that migraine can cause a substantial loss of work productivity[5–8].

The finding in this current study that 74% of surveyed participants who reported ever having experienced migraine had not received a physician diagnosis of migraine indicates a large population of underdiagnosed migraine patients in Japan. This is supported by other studies showing that large proportions of migraine sufferers never consulted a physician[5,6].

Additionally, in this study we found that more than half of the diagnosed migraine patients (53.6%) were currently not receiving treatment with prescribed medication (non-Rx) (Figure

1  
2  
3 1). However, 56.6% of non-Rx had previously received treatment which indicates a high  
4 treatment discontinuation rate which is supported by the previous study by Meyers et al.  
5 where 62.2% discontinued prophylactic treatment after an average of 61.2 days[26]. Also,  
6  
7 43.4% of non-Rx patients have not previously received prescription medication which  
8  
9 reflects an unmet need for treatment. Other studies have similarly described that 30 – 60% of  
10  
11 migraine patients had never received prescription of preventive therapy[27], and that lack of  
12  
13 efficacy and side effects were the most common reasons for discontinuation of both acute and  
14  
15 preventive therapy[27–30]. A recent study reported that among Japanese migraine patients  
16  
17 who visited HCPs, lack of efficacy with both preventive (anticonvulsants and calcium  
18  
19 antagonist) and acute treatment (triptans and NSAIDs) was reported by half and a third of the  
20  
21 patients, respectively[27].  
22  
23

24  
25  
26  
27  
28  
29  
30  
31  
32  
33  
34  
35  
36  
37  
38  
39  
40  
41  
42  
43  
44  
45  
46  
47  
48  
49  
50  
51  
52  
53  
54  
55  
56  
57  
58  
59  
60

Migraine patients currently taking prescribed medication (Rx) had significantly worse migraine-related characteristics compared to migraine patients currently not taking any Rx (Table 1, Figure 3). This indicates that those taking Rx suffer from more severe migraine. Interestingly, migraine patients receiving Rx suffer similar impairment of HRQoL and work productivity as non-Rx patients (Figure 2). This indicates that despite currently available preventive and acute treatments for migraine, there is an unmet need for improved HRQoL and work productivity among migraine patients, implying that current treatments have limited effects on these outcomes for patients. Additionally, only 14.3% of patients currently taking Rx received preventive treatments for migraine, indicating a lack of prescription of preventive therapy. These are important factors to consider for future treatment development. The limitations of the study should be recognized. The data from NHWS is cross-sectional and no causal relationships can be assumed. As all data are self-reported, no verification of patient reported outcomes was conducted, and data is subject to recall bias. Although NHWS is broadly representative of the Japanese adult population, it is unclear the extent to which the

1  
2  
3 migraine patients and migraine patients taking Rx are representative of the larger population.  
4  
5 Due to the design of the survey, the reasons for not taking Rx or for discontinuation of Rx  
6  
7 (e.g. less migraine episodes or lack of efficacy) were not reported and could not be  
8  
9 concluded. Also, NWHS primarily relied upon respondents with Internet access and these  
10  
11 patients could potentially be different from the broader population (e.g., more knowledgeable  
12  
13 or engaged in their healthcare).  
14  
15  
16  
17  
18  
19

## 20 **CONCLUSION**

21  
22  
23 Migraine patients in Japan experience a significant burden of illness with decreased HRQoL,  
24  
25 around 2-fold increased work productivity loss and twice as many visits to HCPs compared to  
26  
27 non-migraine controls. There is a large proportion of both underdiagnosed and undertreated  
28  
29 migraine patients. The migraine patients not receiving prescribed medication for treatment of  
30  
31 their disease suffer similarly decreased HRQoL and high levels of work productivity loss as  
32  
33 patients currently receiving prescribed medication. These results indicate an unmet need for  
34  
35 improved HRQoL and work productivity in Japanese migraine patients despite the currently  
36  
37 available prescription medications, which are important factors to consider for future  
38  
39 development of migraine therapies.  
40  
41  
42  
43  
44  
45  
46  
47  
48  
49  
50  
51  
52  
53  
54  
55  
56  
57  
58  
59  
60

## **AUTHOR CONTRIBUTIONS**

HI, KU and TN conceptualized the study and analysed and interpreted the data. SJ, ZC and YC designed the analysis plan, conducted the analyses and interpreted the data. All authors revised the manuscript drafts for intellectual content and edited the manuscript. All authors reviewed and approved the final draft.

## **ACKNOWLEDGEMENTS**

The authors would like to acknowledge Dina Graae Kristensen at Graae MediWrite, for the medical writing support provided, including development, editing and proofreading of the manuscript.

## **COMPETING INTEREST**

Hisaka Igarashi reports personal fees for consulting, lectures, and speaker's honorarium from Pfizer, Eisai, Otsuka Pharmaceutical, Kyowa Kirin, Takeda Pharmaceutical, Astellas Amgen BioPharma, and Eli Lilly, outside the submitted work. Kaname Ueda, Tomomi Nakamura and Zhihong Cai are full-time employees of Eli Lilly Japan K.K. and shareholders of Eli Lilly & Company. Sungeun Jung and Yirong Chen are full-time employees of Kantar, Health Division.

## **FUNDING**

This research was funded by Lilly Eli Lilly Japan K.K.

## **PATIENT CONSENT FOR PUBLICATION**

Not required



1  
2  
3 **ETHIS APPROVAL**  
4

5  
6 NHWS was granted exemption status upon review by Pearl International Review Board  
7  
8 (Indianapolis, IN).  
9

10  
11 **DATA SHARING STATEMENT**  
12

13  
14 Data are available upon reasonable request.  
15  
16  
17  
18  
19  
20  
21  
22  
23  
24  
25  
26  
27  
28  
29  
30  
31  
32  
33  
34  
35  
36  
37  
38  
39  
40  
41  
42  
43  
44  
45  
46  
47  
48  
49  
50  
51  
52  
53  
54  
55  
56  
57  
58  
59  
60

For peer review only

## REFERENCES

- 1 Vo P, Fang J, Bilitou A, *et al.* Patients' perspective on the burden of migraine in Europe: a cross-sectional analysis of survey data in France, Germany, Italy, Spain, and the United Kingdom. *J Headache Pain* 2018;**19**:82. doi:10.1186/s10194-018-0907-6
- 2 Headache Classification Committee of the International Headache Society (IHS) The International Classification of Headache Disorders, 3rd edition. *Cephalalgia Int J Headache* 2018;**38**:1–211. doi:10.1177/0333102417738202
- 3 GBD 2016 Disease and Injury Incidence and Prevalence Collaborators. Global, regional, and national incidence, prevalence, and years lived with disability for 328 diseases and injuries for 195 countries, 1990–2016: a systematic analysis for the Global Burden of Disease Study 2016. *Lancet Lond Engl* 2017;**390**:1211–59. doi:10.1016/S0140-6736(17)32154-2
- 4 Woldeamanuel YW, Cowan RP. Migraine affects 1 in 10 people worldwide featuring recent rise: A systematic review and meta-analysis of community-based studies involving 6 million participants. *J Neurol Sci* 2017;**372**:307–15. doi:10.1016/j.jns.2016.11.071
- 5 Sakai F, Igarashi H. Prevalence of migraine in Japan: a nationwide survey. *Cephalalgia Int J Headache* 1997;**17**:15–22. doi:10.1046/j.1468-2982.1997.1701015.x
- 6 Takeshima T, Ishizaki K, Fukuhara Y, *et al.* Population-based door-to-door survey of migraine in Japan: the Daisen study. *Headache* 2004;**44**:8–19. doi:10.1111/j.1526-4610.2004.04004.x
- 7 Suzuki N, Ishikawa Y, Gomi S, *et al.* Prevalence and characteristics of headaches in a socially active population working in the Tokyo metropolitan area -surveillance by an industrial health consortium. *Intern Med* 2014;**53**:683–9. doi:10.2169/internalmedicine.53.1700
- 8 Wada K, Arakida M, Watanabe R, *et al.* The Economic Impact of Loss of Performance Due to Absenteeism and Presenteeism Caused by Depressive Symptoms and Comorbid Health Conditions among Japanese Workers. *Ind Health* 2013;**51**:482–9. doi:10.2486/indhealth.2013-0016
- 9 United States Census Bureau. International Data Base. <https://www.census.gov/data-tools/demo/idb/informationGateway.php>
- 10 Bolge SC, Doan JF, Kannan H, *et al.* Association of insomnia with quality of life, work productivity, and activity impairment. *Qual Life Res Int J Qual Life Asp Treat Care Rehabil* 2009;**18**:415–22. doi:10.1007/s11136-009-9462-6
- 11 DiBonaventura MD, Wagner J-S, Yuan Y, *et al.* Humanistic and economic impacts of hepatitis C infection in the United States. *J Med Econ* 2010;**13**:709–18. doi:10.3111/13696998.2010.535576
- 12 Charlson ME, Pompei P, Ales KL, *et al.* A new method of classifying prognostic comorbidity in longitudinal studies: development and validation. *J Chronic Dis* 1987;**40**:373–83.

- 13 Charlson ME, Charlson RE, Peterson JC, *et al.* The Charlson comorbidity index is adapted to predict costs of chronic disease in primary care patients. *J Clin Epidemiol* 2008;**61**:1234–40. doi:10.1016/j.jclinepi.2008.01.006
- 14 Quan H, Li B, Couris CM, *et al.* Updating and validating the Charlson comorbidity index and score for risk adjustment in hospital discharge abstracts using data from 6 countries. *Am J Epidemiol* 2011;**173**:676–82. doi:10.1093/aje/kwq433
- 15 Brazier JE, Roberts J. The Estimation of a Preference-Based Measure of Health From the SF-12: *Med Care* 2004;**42**:851–9. doi:10.1097/01.mlr.0000135827.18610.0d
- 16 Fukuhara S, Bito S, Green J, *et al.* Translation, adaptation, and validation of the SF-36 Health Survey for use in Japan. *J Clin Epidemiol* 1998;**51**:1037–44. doi:10.1016/s0895-4356(98)00095-x
- 17 Fukuhara S, Ware JE, Kosinski M, *et al.* Psychometric and clinical tests of validity of the Japanese SF-36 Health Survey. *J Clin Epidemiol* 1998;**51**:1045–53. doi:10.1016/s0895-4356(98)00096-1
- 18 EuroQol - a new facility for the measurement of health-related quality of life. *Health Policy* 1990;**16**:199–208. doi:10.1016/0168-8510(90)90421-9
- 19 Shirowa T, Fukuda T, Ikeda S, *et al.* Japanese population norms for preference-based measures: EQ-5D-3L, EQ-5D-5L, and SF-6D. *Qual Life Res* 2016;**25**:707–19. doi:10.1007/s11136-015-1108-2
- 20 Reilly MC, Gooch KL, Wong RL, *et al.* Validity, reliability and responsiveness of the Work Productivity and Activity Impairment Questionnaire in ankylosing spondylitis. *Rheumatol Oxf Engl* 2010;**49**:812–9. doi:10.1093/rheumatology/kep457
- 21 Kosinski M, Bayliss MS, Bjorner JB, *et al.* A six-item short-form survey for measuring headache impact: the HIT-6. *Qual Life Res Int J Qual Life Asp Treat Care Rehabil* 2003;**12**:963–74. doi:10.1023/a:1026119331193
- 22 *IBM SPSS Statistics for Windows, Version 22.0.* IBM Corp 2013.
- 23 R Core Team. *R: A language and environment for statistical computing.* Vienna, Austria: : R Foundation for Statistical Computing 2018. <https://www.R-project.org/>
- 24 Maruish ME. *User's Manual for the SF-36v2 Health Survey.* 3rd ed. Quality Metric Incorporated 2011.
- 25 Alonso J, Ferrer M, Gandek B, *et al.* Health-related quality of life associated with chronic conditions in eight countries: Results from the International Quality of Life Assessment (IQOLA) Project. *Qual Life Res* 2004;**13**:283–98. doi:10.1023/B:QURE.0000018472.46236.05
- 26 Meyers JL, Davis KL, Lenz RA, *et al.* Treatment patterns and characteristics of patients with migraine in Japan: A retrospective analysis of health insurance claims data. *Cephalalgia* 2019;**39**:1518–34. doi:10.1177/0333102419851855

- 1  
2  
3 27 Ueda K, Ye W, Lombard L, *et al.* Real-world treatment patterns and patient-reported  
4 outcomes in episodic and chronic migraine in Japan: analysis of data from the Adelphi  
5 migraine disease specific programme. *J Headache Pain* 2019;**20**:68. doi:10.1186/s10194-  
6 019-1012-1  
7  
8  
9 28 Lipton RB, Hutchinson S, Ailani J, *et al.* Discontinuation of Acute Prescription  
10 Medication for Migraine: Results From the Chronic Migraine Epidemiology and  
11 Outcomes (CaMEO) Study. *Headache J Head Face Pain* 2019;**59**:1762–72.  
12 doi:10.1111/head.13642  
13  
14 29 Wells RE, Markowitz SY, Baron EP, *et al.* Identifying the Factors Underlying  
15 Discontinuation of Triptans. *Headache* 2014;**54**:278–89. doi:10.1111/head.12198  
16  
17 30 Blumenfeld AM, Bloudek LM, Becker WJ, *et al.* Patterns of Use and Reasons for  
18 Discontinuation of Prophylactic Medications for Episodic Migraine and Chronic  
19 Migraine: Results From the Second International Burden of Migraine Study (IBMS-II).  
20 *Headache J Head Face Pain* 2013;**53**:644–55. doi:10.1111/head.12055  
21  
22  
23  
24  
25  
26  
27  
28  
29  
30  
31  
32  
33  
34  
35  
36  
37  
38  
39  
40  
41  
42  
43  
44  
45  
46  
47  
48  
49  
50  
51  
52  
53  
54  
55  
56  
57  
58  
59  
60

## FIGURE LEGENDS

### Figure 1. Respondent flow chart

*Abbreviations: NHWS = National Health and Wellness Survey, Rx = prescription medication*

### Figure 2. Comparison of health outcomes between migraine patients and matched non-migraine respondents (A-C), and between migraine patients currently taking Rx and not currently taking Rx (D-F)

*A-C: Migraine patients and matched non-migraine respondents: Bivariate analysis for comparison of health outcomes between migraine patients and matched non-migraine respondents. D-F: Migraine patients currently taking prescription medication (Rx) and migraine patients not currently taking Rx: Adjusted means from GLM analysis for comparison of health outcomes between migraine patients currently taking prescription medication (Rx) and migraine patients not currently taking Rx.*

*Abbreviations: Rx = prescription medication, HRQoL = Health-related quality of life, PCS = physical component summary score, MCS = mental component summary score, RCS = role/social component summary score, EQ-5D = EuroQol-5 Dimension, WPAI = Work Productivity and Activity Impairment, HCRU = healthcare resource utilization, ER = emergency room.*

### Figure 3. Migraine-related symptoms

*Abbreviations: Rx = patients currently taking prescription medication, non-Rx = patients currently not taking prescription medication*

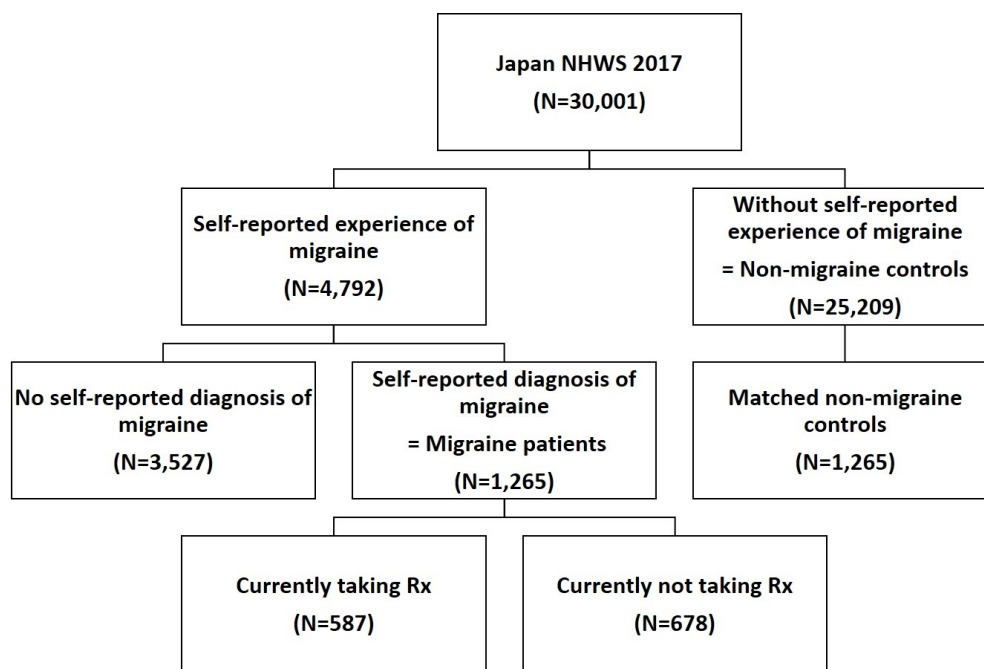

Figure 1. Respondent flow chart

Legend: Abbreviations: NHWS = National Health and Wellness Survey, Rx = prescription medication

228x150mm (150 x 150 DPI)

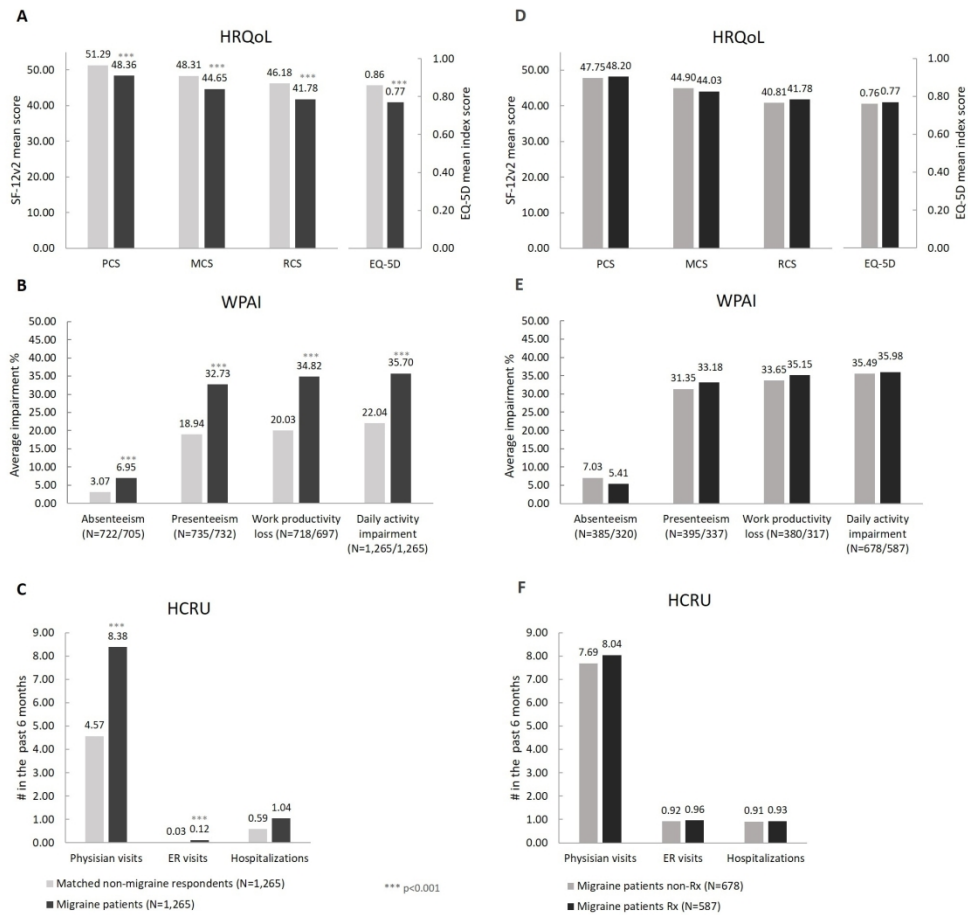

Figure 2. Comparison of health outcomes between migraine patients and matched non-migraine respondents (A-C), and between migraine patients currently taking Rx and not currently taking Rx (D-F)  
 Legend: A-C: Migraine patients and matched non-migraine respondents: Bivariate analysis for comparison of health outcomes between migraine patients and matched non-migraine respondents. D-F: Migraine patients currently taking prescription medication (Rx) and migraine patients not currently taking Rx: Adjusted means from GLM analysis for comparison of health outcomes between migraine patients currently taking prescription medication (Rx) and migraine patients not currently taking Rx. Abbreviations: Rx = prescription medication, HRQoL = Health-related quality of life, PCS = physical component summary score, MCS = mental component summary score, RCS = role/social component summary score, EQ-5D = EuroQol-5 Dimension, WPAI = Work Productivity and Activity Impairment, HCRU = healthcare resource utilization, ER = emergency room.

349x331mm (150 x 150 DPI)

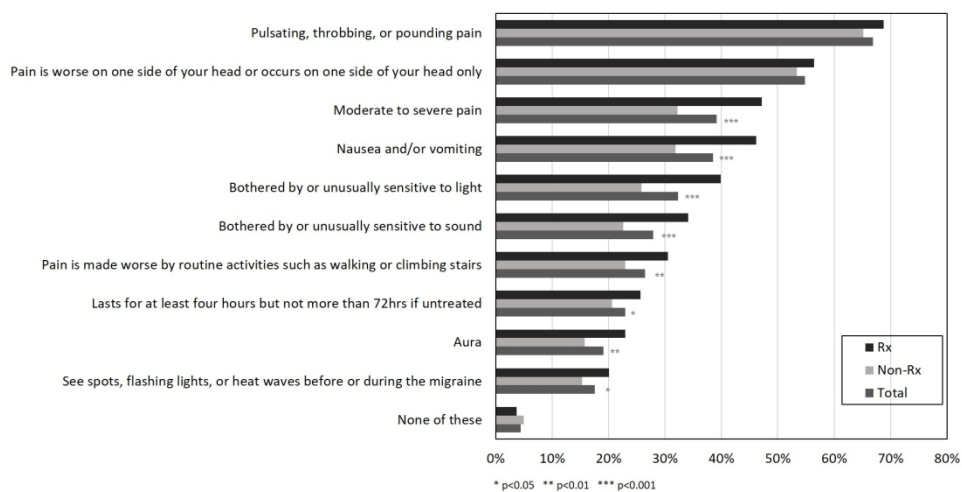

Figure 3. Migraine-related symptoms

Legend: Abbreviations: Rx = patients currently taking prescription medication, non-Rx = patients currently not taking prescription medication

333x170mm (150 x 150 DPI)



Supplementary Table 1. Bivariate comparison of demographic and health characteristics between respondents with no experience of migraine (non-migraine), patients diagnosed with migraine and matched non-migraine respondents.

|                                     |                           | Non-migraine<br>(N=25,209) |             | Matched Non-migraine<br>(N=1,265) |             | Diagnosed migraine<br>(N=1,265) |             | p-value                       | p-value                  |
|-------------------------------------|---------------------------|----------------------------|-------------|-----------------------------------|-------------|---------------------------------|-------------|-------------------------------|--------------------------|
|                                     |                           | Mean or %                  | [SD] or (n) | Mean or %                         | [SD] or (n) | Mean or %                       | [SD] or (n) | Non-migraine<br>vs. Diagnosed | Matched vs.<br>Diagnosed |
| <b>Age, mean [SD]</b>               |                           | 52.80                      | [16.53]     | 43.45                             | [14.59]     | 43.79                           | [14.27]     | < .001                        | .559                     |
| <b>CCI, mean [SD]</b>               |                           | 0.17                       | [0.53]      | 0.18                              | [1.05]      | 0.24                            | [1.00]      | < .001                        | .117                     |
| <b>Gender, % (n)</b>                | Female                    | 47.1%                      | (11,861)    | 67.4%                             | (852)       | 66.6%                           | (842)       | < .001                        | .673                     |
| <b>Employment status, % (n)</b>     | Currently employed        | 54.7%                      | (13,801)    | 60.1%                             | (760)       | 59.8%                           | (756)       | < .001                        | .871                     |
| <b>Household income, % (n)</b>      | <¥3,000,000               | 18.3%                      | (4623)      | 17.9%                             | (227)       | 18.7%                           | (237)       | .683                          | .948                     |
|                                     | ¥3,000,000 to <¥5,000,000 | 24.4%                      | (6154)      | 24.5%                             | (310)       | 25.0%                           | (316)       |                               |                          |
|                                     | ¥5,000,000 to <¥8,000,000 | 23.9%                      | (6027)      | 25.9%                             | (328)       | 24.6%                           | (311)       |                               |                          |
|                                     | ¥8,000,000 or more        | 18.7%                      | (4704)      | 16.9%                             | (214)       | 17.0%                           | (215)       |                               |                          |
|                                     | decline to answer         | 14.7%                      | (3701)      | 14.7%                             | (186)       | 14.7%                           | (186)       |                               |                          |
| <b>Currently smoking, % (n)</b>     | Yes                       | 41.2%                      | (10,385)    | 44.3%                             | (561)       | 44.0%                           | (557)       | .046                          | .873                     |
| <b>Currently use alcohol, % (n)</b> | Yes                       | 66.2%                      | (16,685)    | 63.0%                             | (797)       | 63.2%                           | (800)       | .031                          | .902                     |

Abbreviations: CCI = Charlson Comorbidity Index

Supplementary Table 2. Unadjusted bivariate comparison of health outcomes between migraine patients currently taking Rx and migraine patients not currently taking Rx

| Outcomes                                          | Non-Rx<br>(N=678) |       | Rx<br>(N=587) |       | p-values |
|---------------------------------------------------|-------------------|-------|---------------|-------|----------|
|                                                   | Mean              | SD    | Mean          | SD    |          |
| <b>HRQoL</b>                                      |                   |       |               |       |          |
| SF-12v2: PCS                                      | 48.70             | 12.42 | 47.96         | 12.16 | .290     |
| SF-12v2: MCS                                      | 45.26             | 10.13 | 43.95         | 10.24 | .022     |
| SF-12v2: RCS                                      | 41.93             | 14.40 | 41.61         | 15.40 | .703     |
| EQ-5D index score                                 | .77               | .16   | .76           | .16   | .255     |
| EQ-5D VAS                                         | 65.33             | 23.11 | 63.35         | 23.95 | .134     |
| <b>WPAI</b>                                       |                   |       |               |       |          |
| Absenteeism %*                                    | 7.10              | 17.71 | 6.76          | 16.98 | .795     |
| Presenteeism %**                                  | 31.01             | 26.60 | 34.75         | 27.52 | .063     |
| Work Productivity Loss %***                       | 33.27             | 28.78 | 36.68         | 28.84 | .119     |
| Daily Activity Impairment %                       | 34.07             | 27.52 | 37.58         | 28.28 | .026     |
| <b>HCRU</b>                                       |                   |       |               |       |          |
| Number of physician visits in the past 6 months   | 7.52              | 10.05 | 9.37          | 16.16 | .013     |
| Number of ER visits in the past 6 months          | .13               | .62   | .10           | .71   | .515     |
| Number of times hospitalized in the past 6 months | .98               | 4.71  | 1.11          | 8.85  | .738     |

Abbreviations: Rx = prescription medication, SD = standard deviation, HRQoL = Health-related quality of life, SF-12v2 = Short Form 12 health survey version 2, PCS = physical component summary score, MCS = mental component summary score, RCS = role/social component summary score, EQ-5D = EuroQol 5-Dimension, WPAI = Work Productivity and Activity Impairment, HCRU = healthcare resource utilization, ER = emergency room

\*Sample size of Non-Rx: N=385, Rx: N=320. \*\*Sample size of Non-Rx: N=395, Rx: N=337. \*\*\*Sample size of Non-Rx: N=380 Rx: N=317.

**pSTROBE 2007 (v4) Statement—Checklist of items that should be included in reports of cross-sectional studies**

| Section/Topic             | Item # | Recommendation                                                                                                                                                                       | Reported on page # |
|---------------------------|--------|--------------------------------------------------------------------------------------------------------------------------------------------------------------------------------------|--------------------|
| <b>Title and abstract</b> | 1      | (a) Indicate the study’s design with a commonly used term in the title or the abstract                                                                                               | Page 1             |
|                           |        | (b) Provide in the abstract an informative and balanced summary of what was done and what was found                                                                                  | Page 2             |
| <b>Introduction</b>       |        |                                                                                                                                                                                      |                    |
| Background/rationale      | 2      | Explain the scientific background and rationale for the investigation being reported                                                                                                 | Page 4-5           |
| Objectives                | 3      | State specific objectives, including any prespecified hypotheses                                                                                                                     | Page 5             |
| <b>Methods</b>            |        |                                                                                                                                                                                      |                    |
| Study design              | 4      | Present key elements of study design early in the paper                                                                                                                              | Page 5             |
| Setting                   | 5      | Describe the setting, locations, and relevant dates, including periods of recruitment, exposure, follow-up, and data collection                                                      | Page 5-6           |
| Participants              | 6      | (a) Give the eligibility criteria, and the sources and methods of selection of participants                                                                                          | Page 5-6           |
| Variables                 | 7      | Clearly define all outcomes, exposures, predictors, potential confounders, and effect modifiers. Give diagnostic criteria, if applicable                                             | Page 6-8           |
| Data sources/measurement  | 8*     | For each variable of interest, give sources of data and details of methods of assessment (measurement). Describe comparability of assessment methods if there is more than one group | Page 6-8           |
| Bias                      | 9      | Describe any efforts to address potential sources of bias                                                                                                                            | Not applicable     |
| Study size                | 10     | Explain how the study size was arrived at                                                                                                                                            | Not applicable     |
| Quantitative variables    | 11     | Explain how quantitative variables were handled in the analyses. If applicable, describe which groupings were chosen and why                                                         | Page 6-9           |
| Statistical methods       | 12     | (a) Describe all statistical methods, including those used to control for confounding                                                                                                | Page 8-9           |
|                           |        | (b) Describe any methods used to examine subgroups and interactions                                                                                                                  | Page 9             |
|                           |        | (c) Explain how missing data were addressed                                                                                                                                          | Not applicable     |
|                           |        | (d) If applicable, describe analytical methods taking account of sampling strategy                                                                                                   | Not applicable     |
|                           |        | (e) Describe any sensitivity analyses                                                                                                                                                | Not applicable     |
| <b>Results</b>            |        |                                                                                                                                                                                      |                    |

|                          |     |                                                                                                                                                                                                              |                                     |
|--------------------------|-----|--------------------------------------------------------------------------------------------------------------------------------------------------------------------------------------------------------------|-------------------------------------|
| Participants             | 13* | (a) Report numbers of individuals at each stage of study—eg numbers potentially eligible, examined for eligibility, confirmed eligible, included in the study, completing follow-up, and analysed            | Page 10                             |
|                          |     | (b) Give reasons for non-participation at each stage                                                                                                                                                         | Not applicable                      |
|                          |     | (c) Consider use of a flow diagram                                                                                                                                                                           | Page 10                             |
| Descriptive data         | 14* | (a) Give characteristics of study participants (eg demographic, clinical, social) and information on exposures and potential confounders                                                                     | Page 10                             |
|                          |     | (b) Indicate number of participants with missing data for each variable of interest                                                                                                                          | Table 1                             |
| Outcome data             | 15* | Report numbers of outcome events or summary measures                                                                                                                                                         |                                     |
| Main results             | 16  | (a) Give unadjusted estimates and, if applicable, confounder-adjusted estimates and their precision (eg, 95% confidence interval). Make clear which confounders were adjusted for and why they were included | Supplementary table 1, and page 8-9 |
|                          |     | (b) Report category boundaries when continuous variables were categorized                                                                                                                                    | Not applicable                      |
|                          |     | (c) If relevant, consider translating estimates of relative risk into absolute risk for a meaningful time period                                                                                             | Not applicable                      |
| Other analyses           | 17  | Report other analyses done—eg analyses of subgroups and interactions, and sensitivity analyses                                                                                                               | Page 11-16                          |
| <b>Discussion</b>        |     |                                                                                                                                                                                                              |                                     |
| Key results              | 18  | Summarise key results with reference to study objectives                                                                                                                                                     | Page 18                             |
| Limitations              | 19  | Discuss limitations of the study, taking into account sources of potential bias or imprecision. Discuss both direction and magnitude of any potential bias                                                   | Page 19-20                          |
| Interpretation           | 20  | Give a cautious overall interpretation of results considering objectives, limitations, multiplicity of analyses, results from similar studies, and other relevant evidence                                   | Page 18-19                          |
| Generalisability         | 21  | Discuss the generalisability (external validity) of the study results                                                                                                                                        | Page 20                             |
| <b>Other information</b> |     |                                                                                                                                                                                                              |                                     |
| Funding                  | 22  | Give the source of funding and the role of the funders for the present study and, if applicable, for the original study on which the present article is based                                                | Page 21                             |

\*Give information separately for cases and controls in case-control studies and, if applicable, for exposed and unexposed groups in cohort and cross-sectional studies.

**Note:** An Explanation and Elaboration article discusses each checklist item and gives methodological background and published examples of transparent reporting. The STROBE checklist is best used in conjunction with this article (freely available on the Web sites of PLoS Medicine at <http://www.plosmedicine.org/>, Annals of Internal Medicine at <http://www.annals.org/>, and Epidemiology at <http://www.epidem.com/>). Information on the STROBE Initiative is available at [www.strobe-statement.org](http://www.strobe-statement.org).

# BMJ Open

## The social burden of people with the migraine diagnosis in Japan: evidence from a population-based cross-sectional survey

|                                 |                                                                                                                                                                                                                                                                                                                                                                                                                      |
|---------------------------------|----------------------------------------------------------------------------------------------------------------------------------------------------------------------------------------------------------------------------------------------------------------------------------------------------------------------------------------------------------------------------------------------------------------------|
| Journal:                        | <i>BMJ Open</i>                                                                                                                                                                                                                                                                                                                                                                                                      |
| Manuscript ID                   | bmjopen-2020-038987.R1                                                                                                                                                                                                                                                                                                                                                                                               |
| Article Type:                   | Original research                                                                                                                                                                                                                                                                                                                                                                                                    |
| Date Submitted by the Author:   | 15-Sep-2020                                                                                                                                                                                                                                                                                                                                                                                                          |
| Complete List of Authors:       | Igarashi, Hisaka; Fujitsu Clinic, Headache Care Unit, Department of Internal Medicine<br>Ueda, Kaname; Eli Lilly Japan KK, Medicines Development Unit Japan<br>Jung, Sungeun; Kantar Health Inc, Health Division<br>Cai, Zhihong; Eli Lilly Japan KK, Medicines Development Unit Japan<br>Chen, Yirong; Kantar Health Inc, Health Division<br>Nakamura, Tomomi; Eli Lilly Japan KK, Medicines Development Unit Japan |
| <b>Primary Subject Heading</b>: | Neurology                                                                                                                                                                                                                                                                                                                                                                                                            |
| Secondary Subject Heading:      | Public health                                                                                                                                                                                                                                                                                                                                                                                                        |
| Keywords:                       | Migraine < NEUROLOGY, PUBLIC HEALTH, HEALTH ECONOMICS                                                                                                                                                                                                                                                                                                                                                                |
|                                 |                                                                                                                                                                                                                                                                                                                                                                                                                      |

SCHOLARONE™  
Manuscripts



I, the Submitting Author has the right to grant and does grant on behalf of all authors of the Work (as defined in the below author licence), an exclusive licence and/or a non-exclusive licence for contributions from authors who are: i) UK Crown employees; ii) where BMJ has agreed a CC-BY licence shall apply, and/or iii) in accordance with the terms applicable for US Federal Government officers or employees acting as part of their official duties; on a worldwide, perpetual, irrevocable, royalty-free basis to BMJ Publishing Group Ltd ("BMJ") its licensees and where the relevant Journal is co-owned by BMJ to the co-owners of the Journal, to publish the Work in this journal and any other BMJ products and to exploit all rights, as set out in our [licence](#).

The Submitting Author accepts and understands that any supply made under these terms is made by BMJ to the Submitting Author unless you are acting as an employee on behalf of your employer or a postgraduate student of an affiliated institution which is paying any applicable article publishing charge ("APC") for Open Access articles. Where the Submitting Author wishes to make the Work available on an Open Access basis (and intends to pay the relevant APC), the terms of reuse of such Open Access shall be governed by a Creative Commons licence – details of these licences and which [Creative Commons](#) licence will apply to this Work are set out in our licence referred to above.

Other than as permitted in any relevant BMJ Author's Self Archiving Policies, I confirm this Work has not been accepted for publication elsewhere, is not being considered for publication elsewhere and does not duplicate material already published. I confirm all authors consent to publication of this Work and authorise the granting of this licence.

1  
2  
3 **Title: The social burden of people with the migraine diagnosis in Japan:**  
4 **evidence from a population-based cross-sectional survey**  
5  
6  
7

8 **Authors:** Hisaka Igarashi<sup>1</sup>, Kaname Ueda<sup>2</sup>, Sungeun Jung<sup>3</sup>, Zhihong Cai<sup>2</sup>, Yirong Chen<sup>4</sup>,  
9 Tomomi Nakamura<sup>2</sup>  
10  
11

12  
13  
14 **Author affiliations:**

15  
16 <sup>1</sup> Headache Care Unit, Department of Internal Medicine, Fujitsu Clinic, Kawasaki, Japan

17 <sup>2</sup> Medicines Development Unit Japan, Eli Lilly Japan K.K., Kobe, Japan

18 <sup>3</sup> Health Division, Kantar Health, Seoul, South Korea

19 <sup>4</sup> Health Division, Kantar Health, Singapore, Singapore  
20  
21  
22

23 **Corresponding author:**

24 Kaname Ueda

25 Research Scientist

26 Medicines Development Unit Japan

27 Eli Lilly Japan K.K.

28 5-1-28 Isogamidori,

29 Chuo-ku, Kobe 651-0086 Japan

30 Tel: 81-78-242-9519

31 Fax: 81-78-242-9939

32 Email: [ueda\\_kaname@lilly.com](mailto:ueda_kaname@lilly.com)  
33  
34  
35  
36  
37  
38  
39  
40

41 **Word count: 3614** (Limit 4000, excluding title page, abstract, references, figures and tables)  
42  
43  
44  
45  
46  
47  
48  
49  
50  
51  
52  
53  
54  
55  
56  
57  
58  
59  
60

**ABSTRACT (max. 300 words, current 292 words)**

**Objectives** To quantify the social burden among Japanese migraine patients in the context of currently available migraine treatments, by comparison with non-migraine controls, and comparison of migraine patients currently taking prescription medication vs. not taking prescription medication.

**Design** Cross-sectional analysis.

**Setting** Data from the population-based online self-administered Japan National Health and Wellness Survey (NHWS) 2017.

**Participants** Respondents to the NHWS (N=30,001) were  $\geq 18$  years. Migraine patients were respondents with self-reported experience and physician diagnosis of migraine. Non-migraine controls reported no migraine experience. Migraine patients were sub-grouped into currently taking prescription medication for migraine (Rx) and currently not taking prescription medication (non-Rx).

**Methods** One-way ANOVA tests were performed to compare health-related quality of life (HRQoL), work productivity and activity impairment and healthcare resource utilization between migraine patients and matched non-migraine controls selected by 1:1 propensity score matching. Generalized linear models were used to compare outcomes and migraine related characteristics between Rx and non-Rx.

**Results** Compared to matched controls, migraine patients (N=1,265) had significantly lower HRQoL in terms of lower Physical Component Summary (48.36 vs. 51.29,  $p < 0.001$ ), Mental Component Summary (44.65 vs. 48.31,  $p < 0.001$ ), Role/Social Component Summary (41.78 vs. 46.18,  $p < 0.001$ ) and mean EuroQol 5-Dimension index (0.77 vs. 0.86,  $p < 0.001$ ) scores. Migraine patients experienced significantly higher absenteeism (6.95% vs. 3.07%,  $p < 0.001$ ), presenteeism (32.73% vs. 18.94%,  $p < 0.001$ ), work productivity loss (34.82% vs. 20.03%,  $p < 0.001$ ) and daily activity impairment (35.70% vs. 22.04%,  $p < 0.001$ ) and visited health care professionals more often (8.38 vs. 4.57,  $p < 0.001$ ) than controls. No significant differences in these outcomes were found when comparing Rx (N=587) and non-Rx (N=678) patients.

**Conclusions** There is an unmet need for improved HRQoL and work productivity in Japanese migraine patients despite the currently available prescription medications, which are important factors to consider for future development of migraine therapies.



## STRENGTHS AND LIMITATIONS

- The recruitment of respondents to the Japan 2017 NHWS utilized a stratified random sampling procedure with strata by sex and age according to national census data, thereby ensuring that the demographic composition of the sample was representative of the adult population in Japan.
- This study used the validated instruments Short Form-12 version 2, EuroQol-5 Dimension, Work Productivity and Activity Impairment questionnaire to quantify the burden of migraine and Headache Impact Test for assessment of headache-related disability.
- The data from NHWS is cross-sectional and no causal relationships can be assumed.
- As all data are self-reported, no verification of patient reported outcomes was conducted, and data is subject to recall bias.
- Although NHWS is broadly representative of the Japanese adult population, it is unclear the extent to which the migraine patients and migraine patients taking Rx are representative of the larger population.

## INTRODUCTION

Migraine is a common disabling headache disorder, known to impose a burden on both patients and societies worldwide[1–3]. Since 1990, migraine has been the second leading cause of years lived with disability (YLD) and the sixth most prevalent disease[4]. Globally the prevalence of migraine has been estimated to be 11.6%, and in Asia 10.1%[5]. The 1-year prevalence of migraine among adults in East Asia ranged from 6.0% to 14.3%[6]. In Japan, the prevalence has been estimated to be between 6.0 - 8.9%, with the 1-year prevalence among non-elderly adults reported at 6.0%[6–9].

A recent study of European migraine patients showed that suffering from at least 4 monthly headache days (MHDs) was associated with poorer health related quality of life (HRQoL), high healthcare resource utilizations (HCRU) and loss of work productivity compared to non-migraine controls[1]. In another study among migraine patients with at least 4 MHDs and had failed at least one preventive migraine treatment, impact of migraine on professional, private, and social domains were reported by 70%, 64% and 78% of the respondents, respectively[10]. Migraine was also reported to be associated with a high economic burden, with annual direct cost of chronic migraine substantially higher than that of episodic migraine[11]. In Japan, previous studies have also reported an incremental impact of migraine on patients' social life and work. In a nationwide survey from 1997, 30% of migraine patients reported a severe impairment of their daily activities where bed rest was frequently required. Furthermore, 32% of migraine patients reported moderate to severe impairment in social activities including cancellation of work and daily appointments[7]. Similarly, in the regional Daisen study from 1999, 20.3% of migraine patients reported that they had experienced time or days off from work and 27.3% reported being unable to do housework[8]. The general health perception was worse compared to non-headache subjects, as migraine patients more often reported their health as “poor” and half of the patients

1  
2  
3 suffered from sleep disturbance[8]. Despite the disabling impact of migraine, both surveys  
4 revealed large populations of underdiagnosed and undertreated migraine patients. More than  
5  
6  
7  
8 60% of patients had never consulted a physician for headache, as few as 5%–7% of patients  
9  
10 continuously consulted a physician for migraine[7,8], and only 11.6% of patients were aware  
11  
12 that their headache was migraine[7,8]. Further studies have investigated the impact of  
13  
14 migraine on the active Japanese workforce, which found that 22.4% of migraineurs had  
15  
16 missed work due to headaches several times in the past year[9]. Additionally, migraine and  
17  
18 headaches were the leading cause of absence from work (absenteeism) for employed women  
19  
20 in their 50s (6.2 days of absence, 4 weeks recall period), and the leading cause of not being  
21  
22 able to fully perform while at work (presenteeism) for employed men in their 20s with 49.5  
23  
24 hours lost in the last 4 weeks[12].  
25  
26  
27

28 With these most recent studies of migraine burden performed in 2008[9] and 2013[12], there  
29  
30 has been a paucity in research and there is a need for updated data to gain further insights and  
31  
32 understand the current burden of migraine in Japan, in the context of currently available  
33  
34 treatments. Therefore, the objective of this study was to quantify the migraine associated  
35  
36 burden by comparison of HRQoL, work productivity and activity impairment (WPAI) and  
37  
38 HCRU in migraine patients and people without migraine experience, and among the treated  
39  
40 migraine population vs. non-treated migraine population.  
41  
42  
43  
44  
45  
46  
47

## 48 **METHODS**

49  
50 This research was a cross-sectional study using data from the National Health and Wellness  
51  
52 Survey (NHWS) conducted in 2017. NHWS is an online self-administered survey and was  
53  
54 granted exemption status upon review by Pearl International Review Board (Indianapolis,  
55  
56 IN). All respondents provided informed consent prior to participating.  
57  
58  
59  
60

## Study population

Respondents to the NHWS were aged 18 years or older and were recruited from web-based opt-in consumer panels. Respondents were already members of these panels, recruited through opt-in emails, co-registration with panel partners, newsletter campaigns, banner placements and had provided informed consent prior to participation. Recruitment of NHWS respondents utilized a stratified random sampling procedure, with strata by sex and age according to census data from the US census database which sources from the Japan Ministry of Internal Affairs & Communications[13], which was implemented to ensure that the demographic composition of the sample was representative of the Japan adult population. Representation of NHWS data has been validated and weighted against reliable sources including government agencies' health statistics and unaffiliated third parties[14,15]. Respondents who self-reported a physician diagnosis of migraine were included in the migraine patient group. Those who self-reported no experience of migraine were the non-migraine controls. Respondents with self-reported physician diagnosis of migraine were further sub-grouped into patients who reported currently taking prescription medication for migraine (Rx) and patients currently not taking any prescription medication (non-Rx).

## Patient involvement

Patients and respondents to NHWS were not involved in setting the research questions, outcomes measures nor the design of the study. The data used in this study were obtained from patients and respondents who provided self-reported information in the NHWS.

## Measures

### *Covariates*

1  
2  
3 The demographic and general health characteristics included: gender, age, marital status,  
4 number of children living in the household, household income, employment status, smoking  
5 status, alcohol use, exercise behaviour and Charlson Comorbidity Index (CCI)[16–18].  
6  
7  
8  
9

### 10 11 12 *Measures*

13  
14 HRQoL was assessed by the Short Form-12 health survey version 2 (SF-12v2)[19], which  
15 consists of 12 questions with summary scores that was translated and validated for use in the  
16 Japanese population[20,21]. The mental component summary score (MCS), physical  
17 component summary score (PCS) and role/social component summary (RCS) were calculated  
18 based on survey responses. Each domain and summary score was calculated using a norm-  
19 based scoring algorithm which allows for all measures to be viewed together on the same  
20 graph and allows for scores to be interpreted relative to population means. Higher scores  
21 indicate better quality of life.  
22  
23  
24  
25  
26  
27  
28  
29  
30  
31

32  
33 Health state utilities were quantified with the EuroQol 5-Dimension 5 Levels (EQ-5D 5L)  
34 instrument, which is a standardized measure of health status to provide a simple, generic  
35 measure of health[22]. EQ-5D index score is a single summary index derived from the EQ-  
36 5D 5L questions[23], scored by using the Japanese tariff. Higher scores indicate better health  
37 status. In addition, the EuroQol visual analogue scale (EQ VAS) was used which records the  
38 patient's self-rated health on a 100mm VAS, where the endpoints are labelled 'The best  
39 health you can imagine' (100) and 'The worst health you can imagine' (0). The VAS can be  
40 used as a quantitative measure of health outcome that reflect the patient's own judgement.  
41  
42  
43  
44  
45  
46  
47  
48  
49  
50

51 For work productivity assessment, the Work Productivity and Activity Impairment (WPAI)  
52 questionnaire[24] was used to measure the impact of health on both employment-related and  
53 daily activities. This six-item validated instrument consists of four metrics: absenteeism (the  
54 percentage of work time missed because of one's health in the past 7 days), presenteeism (the  
55  
56  
57  
58  
59  
60

1  
2  
3 percentage of impairment experienced because of one's health while at work in the past 7  
4  
5 days), overall work productivity loss (an overall impairment estimate that is a combination of  
6  
7 absenteeism and presenteeism), and daily activity impairment (the percentage of impairment  
8  
9 in daily activities because of one's health in the past 7 days). These four subscales are  
10  
11 generated in the form of percentages, with higher values indicating greater impairment. Only  
12  
13 respondents who reported being full-time, part-time, or self-employed provide data for  
14  
15 absenteeism, presenteeism, and overall work impairment. All respondents provide data for  
16  
17 activity impairment.  
18  
19

20  
21 HCRU was considered in terms of the number of outpatient visits in the past 6 months to  
22  
23 healthcare providers (practitioner/family practitioners, internists, and dentists as well as more  
24  
25 specialized physicians), the emergency room (ER), and the hospitalization for the  
26  
27 participant's own medical condition.  
28  
29

30  
31 Respondents with migraine utilized the validated Headache Impact Test (HIT-6) scale for  
32  
33 assessment of headache-related disability[25]. Scores from HIT-6 range from 36 to 78. A  
34  
35 higher HIT-6 score indicates a greater impact of headache on the daily life of respondents.  
36  
37

#### 38 39 40 *Migraine-specific characteristics and treatment*

41  
42 All migraine patients were asked several questions in relation to their migraine including the  
43  
44 symptoms experienced due to migraine, number of years experiencing migraine, diagnosing  
45  
46 physician, number of migraines in the past 30 days and in the past 6 months, number of  
47  
48 headache days in the past 30 days, experienced migraine related to menstrual cycle, days of  
49  
50 missed work due to migraine in the past 6 months, days of missed household activities due to  
51  
52 migraine in the past 6 months, current use of prescription medication (Rx) to treat or prevent  
53  
54 migraine, and usage of over-the-counter (OTC) or herbal products to treat migraine.  
55  
56

57  
58 Respondents specified the type of Rx which included the following drug classes: triptan,  
59  
60

1  
2  
3 anticonvulsant, beta blocker, non-steroidal anti-inflammatory drugs (NSAIDs) and others.

4  
5 The top 10 self-reported OTC and herbal products contained the following active ingredients:  
6  
7 loxoprofen, aspirin, ibuprofen, acetaminophen, chondroitin, and ergotamine. In addition,  
8  
9 respondents with migraine answered the validated HIT-6 scale for assessment of headache-  
10  
11 related disability[25].  
12  
13  
14  
15  
16

### 17 **Statistical analysis**

18  
19  
20 Demographic factors and general health characteristics were compared between migraine  
21  
22 patients and non-migraine controls to understand the baseline differences in the two groups.

23  
24 Demographic factors, general health characteristics, and migraine-specific variables were  
25  
26 summarized descriptively among migraine patients. Age, CCI, gender, employment status,  
27  
28 household income, smoking status, and alcohol use were used in the 1:1 propensity score  
29  
30 matching using a greedy matching algorithm to form the matched non-migraine control  
31  
32 group. Post-matching bivariate comparisons were conducted between migraine patients and  
33  
34 matched non-migraine respondents to assess the balance of the matching. After propensity  
35  
36 score matching, outcomes were compared between patients with migraine and matched non-  
37  
38 migraine controls. One-way ANOVA tests were used for comparison of these continuous  
39  
40 outcome variables.  
41  
42  
43  
44

45  
46 Demographic factors, general health characteristics, migraine-specific variables (including  
47  
48 migraine-related symptoms) were also compared between migraine patients currently taking  
49  
50 Rx and not currently taking Rx, using chi-square test for categorical variables and one-way  
51  
52 analyses of variance (ANOVA) for continuous variables. Generalized linear models (GLMs)  
53  
54 were used to compare the outcomes between migraine patients currently taking Rx and  
55  
56 migraine patients currently not taking Rx, accounting for demographic and clinical  
57  
58 characteristics of the patients. Normal distribution with identity link were specified in the  
59  
60

1  
2  
3 GLMs for normally distributed outcomes, such as HRQoL scores. Negative binomial  
4  
5 distribution with log link were specified for outcomes with skewed distributions, such as  
6  
7 WPAI and HCRU. Estimated adjusted means and p-values were reported for each health  
8  
9 outcome. All outcome variables were pre-determined before the analyses and the analyses  
10  
11 were not of exploratory manner. No correction for multiple testing was conducted for this  
12  
13 study. Complete data were available, and no imputation was carried out. For all analyses,  
14  
15 statistical significance was assessed at a significance level of 0.05. All data analyses were  
16  
17 performed using IBM SPSS Statistics Version 22[26] and R Version 3.4.4[27].  
18  
19  
20  
21  
22  
23  
24

## 25 **RESULTS**

26  
27 A total of 25,209 respondents without self-reported experience with migraine were included  
28  
29 in the non-migraine group and 4,792 respondents self-reported experience with migraine  
30  
31 (Figure 1). Among the 4,792 respondents who self-reported experience with migraine, 74%  
32  
33 (n=3,527) had never been diagnosed by a physician. The 1,265 respondents with self-reported  
34  
35 physician diagnosed migraine were included in the migraine patient group for the further  
36  
37 analyses.  
38  
39

40  
41 On average, migraine patients tend to be younger than non-migraine respondents (43.8 vs.  
42  
43 52.8 years,  $p < 0.001$ ) and have a significantly higher CCI index (0.24 vs. 0.17,  $p < 0.001$ )  
44  
45 (Supplementary Table 1). More migraine patients are female (66.6% vs. 47.1%,  $p < 0.001$ ),  
46  
47 currently employed (59.8% vs. 54.7%,  $p < 0.001$ ) and have children in the household (27.7%  
48  
49 vs. 18.6%  $p < 0.001$ ). Compared to controls, fewer migraine patients are married/living with  
50  
51 partner (53.1% vs. 62.5%,  $p < 0.001$ ) and have completed university (42.5% vs. 49.2%,  $p <$   
52  
53 0.001). Migraine patients have similar household income to non-migraine respondents. A  
54  
55 slightly higher percentage of migraine patients currently smoke (44.0% vs. 41.2%,  $p=0.046$ )  
56  
57 compared to non-migraine respondents, but slightly fewer migraine patients currently  
58  
59  
60



1  
2  
3 consume alcohol (63.2% vs. 66.2%,  $p=0.031$ ). Detailed results are listed in Supplementary  
4  
5 Table 1.  
6  
7  
8  
9

### 10 **Comparison of outcomes in migraine patients vs. matched non-migraine controls**

11  
12 After 1:1 propensity score matching, the majority of demographic and clinical characteristics  
13 were balanced between migraine patients and matched non-migraine controls (Supplementary  
14 Table 1). Bivariate comparison between matched non-migraine controls and migraine  
15 patients were conducted to evaluate the burden of migraine in terms of HRQoL, WPAI and  
16 HCRU (Figure 2). We found that migraine patients had significantly lower PCS (48.36 vs.  
17 51.29,  $p<0.001$ ), MCS (44.65 vs. 48.31,  $p<0.001$ ), and RCS (41.78 vs. 46.18,  $p<0.001$ ) scores  
18 as well as significantly lower EQ-5D index (0.77 vs. 0.86,  $p<0.001$ ) and EQ-5D VAS (64.41  
19 vs. 73.49,  $p<0.001$ ) scores. The differences in MCS and RCS between the two groups were  
20 more than 3 points, which is defined as a minimum clinically important difference  
21 (MCID)[28] (Figure 2A).  
22  
23  
24  
25  
26  
27  
28  
29  
30  
31  
32  
33  
34

35 In terms of WPAI, migraine patients experienced significantly higher absenteeism (6.95% vs.  
36 3.07%,  $p<0.001$ ), presenteeism (32.73% vs. 18.94%,  $p<0.001$ ), work productivity loss  
37 (34.82% vs. 20.03%,  $p<0.001$ ) and daily activity impairment (35.70% vs. 22.04%,  $p<0.001$ )  
38 compared to matched controls (Figure 2B).  
39  
40  
41  
42  
43  
44

45 Compared to controls, migraine patients visited health care professionals (HCPs) almost  
46 twice as often (8.38 vs. 4.57,  $p<0.001$ ) and visited the ER 4 times as often (0.12 vs. 0.03,  
47  $p<0.001$ ). There were no significant differences in the number of hospitalizations between the  
48 two groups (Figure 2C).  
49  
50  
51  
52  
53  
54

### 55 **Migraine-related health characteristics among migraine patients**

56  
57  
58  
59  
60

1  
2  
3 On average, patients received a migraine diagnosis 11.77 years ago (standard deviation (SD)  
4 10.84), and the majority (58.3%) were diagnosed by a primary care physician/general  
5  
6 practitioner (GP)/internist (Table 1). On average, patients experienced migraine 4.69 times  
7  
8 (SD 6.22) in the past 30 days and 23.36 times (SD 33.72) in the past 6 months. In the past 30  
9  
10 days, migraine patients had an average of 6.45 (SD 7.02) headache days. Among female  
11  
12 migraine patients, 41.4% experienced menstrual-related migraine. An average of 1.62 days of  
13  
14 work and 2.94 days of household activities were missed due to migraine in the past 6 months.  
15  
16 Among all patients, the average HIT-6 score was 59.37 (SD 7.97) and more than half (57.2%)  
17  
18 of patients were severely impacted (HIT-6 score  $\geq 60$ )[25].  
19  
20  
21  
22

23  
24 The most common migraine-related symptom was pulsating, throbbing, or pounding pain  
25  
26 (66.9%), followed by “pain being worse on one side of your head or occurs on one side of  
27  
28 your head only” (54.8%), moderate to severe pain (39.1%), nausea and/or vomiting (38.5%),  
29  
30 bothered by or unusually sensitive to light (32.3%), bothered by or unusually sensitive to  
31  
32 sound (27.9%), pain made worse by routine activities such as walking or climbing stairs  
33  
34 (26.5%), migraine lasting for at least four hours but not more than 72 hours if untreated  
35  
36 (23.0%), aura (19.1%), and seeing spots, flashing lights, or “heat waves” before or during the  
37  
38 migraine (17.5%). 4.4% of patients experienced none of the above symptoms (Figure 3).  
39  
40  
41  
42  
43  
44  
45  
46  
47  
48  
49  
50  
51  
52  
53  
54  
55  
56  
57  
58  
59  
60

Table 1. Bivariate comparison of migraine-related health characteristics in diagnosed migraine patients and patients currently taking Rx vs. patients not currently taking Rx (non-Rx).

|                                                                                            |                                     | Diagnosed migraine patients<br>(N=1,265) |             | Non-Rx<br>(N=678) |             | Rx<br>(N=587) |             | p-value<br>Non-Rx vs. Rx |
|--------------------------------------------------------------------------------------------|-------------------------------------|------------------------------------------|-------------|-------------------|-------------|---------------|-------------|--------------------------|
|                                                                                            |                                     | Mean or %                                | [SD] or (n) | Mean or %         | [SD] or (n) | Mean or %     | [SD] or (n) |                          |
| <b>Time since migraine (years), mean [SD]*</b>                                             |                                     | 11.27                                    | [10.87]     | 11.14             | [11.20]     | 11.44         | [10.41]     | .635                     |
| <b>Diagnosing physician, % (n)*</b>                                                        | Primary Care Physician/GP/Internist | 58.3%                                    | (686)       | 60.3%             | (409)       | 55.5%         | (277)       | .181                     |
|                                                                                            | Neurologist                         | 27.2%                                    | (320)       | 25.2%             | (171)       | 29.9%         | (149)       |                          |
|                                                                                            | Other                               | 14.5%                                    | (171)       | 14.5%             | (98)        | 14.6%         | (73)        |                          |
| <b>Number of migraine in the past 30 days, mean [SD]</b>                                   |                                     | 4.69                                     | [6.22]      | 3.61              | [5.54]      | 5.95          | [6.72]      | < .001                   |
| <b>Number of migraine in the past 6 months, mean [SD]</b>                                  |                                     | 23.36                                    | [33.72]     | 17.70             | [29.13]     | 29.91         | [37.31]     | < .001                   |
| <b>Days missed work due to migraine in the past 6 months, mean [SD]</b>                    |                                     | 1.62                                     | [10.24]     | 1.39              | [9.37]      | 1.89          | [11.17]     | .384                     |
| <b>Days of household activities missed due to migraine in the past 6 months, mean [SD]</b> |                                     | 2.94                                     | [12.67]     | 1.81              | [5.70]      | 4.25          | [17.48]     | < .001                   |
| <b>Number of headache days in the past 30 days, mean [SD]</b>                              |                                     | 6.45                                     | [7.02]      | 5.12              | [5.88]      | 7.70          | [7.75]      | < .001                   |
| <b>Number of headache days in the past 30 days, % (n)</b>                                  | 0-3 MHDs                            | 49.4%                                    | (365)       | 57.3%             | (205)       | 42.0%         | (160)       | < .001                   |
|                                                                                            | 4-14 MHDs                           | 36.8%                                    | (272)       | 33.8%             | (121)       | 39.6%         | (151)       |                          |
|                                                                                            | ≥15 MHDs                            | 13.8%                                    | (102)       | 8.9%              | (32)        | 18.4%         | (70)        |                          |
|                                                                                            | Don't know                          | 24.0%                                    | (304)       | 24.4%             | (161)       | 24.0%         | (143)       |                          |
|                                                                                            | Not asked                           | 17.5%                                    | (222)       | 10.7%             | (159)       | 17.5%         | (63)        |                          |
| <b>Menstrual-related migraine (N=female only), % (n)**</b>                                 |                                     | 41.4%                                    | (349)       | 38.0%             | (167)       | 45.3%         | (182)       | .031                     |
| <b>Use of OTC/Herbal products to treat migraine, % (n)</b>                                 |                                     | 12.9%                                    | (163)       | 14.6%             | (99)        | 10.9%         | (64)        | .050                     |
| <b>Currently using Rx to treat or prevent migraine, % (n)</b>                              |                                     | 46.4%                                    | (587)       | -                 | -           | 100%          | (587)       | -                        |
| <b>Acute medication only, % (n)***</b>                                                     |                                     | 77.5%                                    | (455)       | -                 | -           | 77.5%         | (455)       |                          |
| <b>Preventive medication only, % (n)***</b>                                                |                                     | 14.3%                                    | (84)        | -                 | -           | 14.3%         | (84)        |                          |
| <b>Both, % (n)***</b>                                                                      |                                     | 8.2%                                     | (48)        | -                 | -           | 8.2%          | (48)        |                          |
| <b>HIT-6 score, mean [SD]</b>                                                              |                                     | 59.37                                    | [7.97]      | 57.76             | [8.00]      | 61.23         | [7.52]      | < .001                   |
| <b>HIT-6 impact grade, % (n)</b>                                                           | Little to no impact                 | 11.3%                                    | (143)       | 14.9%             | (101)       | 7.2%          | (42)        | < .001                   |
|                                                                                            | Moderate impact                     | 16.3%                                    | (206)       | 19.8%             | (134)       | 12.3%         | (72)        |                          |
|                                                                                            | Substantial impact                  | 15.3%                                    | (193)       | 16.4%             | (111)       | 14.0%         | (82)        |                          |
|                                                                                            | Severe impact                       | 57.2%                                    | (723)       | 49.0%             | (332)       | 66.6%         | (391)       |                          |

1  
2  
3  
4  
5  
6  
7  
8  
9  
10  
11  
12  
13  
14  
15  
16  
17  
18  
19  
20  
21  
22  
23  
24  
25  
26  
27  
28  
29  
30  
31  
32  
33  
34  
35  
36  
37  
38  
39  
40  
41  
42  
43  
44  
45  
46

Abbreviations: Rx = prescription medication, SD = standard deviation, GP = General practitioner, MHD = monthly headache day, OTC = over-the-counter medication, HIT = Headache Impact Test.

\*Sample size of diagnosed migraine patients who reported the time since diagnosis: N=1177, Non-Rx: N=678, Rx: N=499. \*\*Sample size of diagnosed migraine patients: N=842, Non-Rx: N=440, Rx: N=402. \*\*\*Sample size of diagnosed migraine patients taking Rx: N=587.

For peer review only

### **Treatment use in migraine patients**

Among all migraine patients, the majority (678; 53.6%) were not currently taking any prescription medication (Rx) (Figure 1). 587 (46.4%) were currently taking prescription medication (Rx), whereof 77.5% currently used acute treatment, 14.3% used preventive treatments and 8.2% used both (Table 1). Of the 678 migraine patients not currently taking Rx, 384 (56.6%) had previously used a prescription medication and 294 (43.4%) had never used a prescription medication, and 50 (17.0%) of the 294 patients had been recommended a prescription medication by the physician before. Of the migraine patients not currently taking Rx, 99 (14.6%) had used OTC or herbal product to treat migraine. Out of the total 1,265 migraine patients, only 163 patients (12.9%) had used OTC or herbal product to treat migraine and 142 patients recalled the name of the OTCs they used.

### **Comparison of outcomes in Rx patients vs. non-Rx patients**

There were no differences in demographic characteristics between the Rx and non-Rx group, except for marital status. Significantly fewer patients taking Rx were married or living with partner (47.0% vs. 58.4%,  $p<0.001$ ) (Table 2). In terms of migraine-related characteristics, migraine patients currently taking Rx experienced migraine significantly more often in the past 30 days (5.95 vs. 3.61,  $p<0.001$ ) and in the past 6 months (29.91 vs. 17.70,  $p<0.001$ ) compared to those not currently taking Rx (Table 1). More days of household activities (4.25 vs. 1.81,  $p<0.001$ ) were missed due to migraine among patients currently taking Rx and a significantly higher percentage of patients had  $\geq 15$  MHDs (18.4% vs. 8.9%,  $p<0.001$ ) (Table 1). A significantly higher average HIT-6 score (61.23 vs. 57.76,  $p<0.001$ ) was observed among migraine patients currently taking Rx and a higher percentage were determined to have severe impact (66.6% vs. 49.0%,  $p<0.001$ ) (Table 1).

1  
2  
3 Without adjustment, the bivariate comparisons of outcomes in Rx vs. non-Rx showed that  
4  
5 migraine patients currently taking Rx had a lower MCS, higher daily activity impairment and  
6  
7 increased number of visits to physicians in the past 6 months. No other differences in  
8  
9 outcomes were observed (Supplementary Table 2).  
10  
11

12 After adjusting for potential confounding effects (age, CCI, gender, marital status, currently  
13  
14 employed and number of migraines in the past 30 days), no significant differences in  
15  
16 HRQoL, WPAI or HCRU were found between the two groups (Figure 2 D-F).  
17  
18  
19  
20  
21  
22  
23  
24  
25  
26  
27  
28  
29  
30  
31  
32  
33  
34  
35  
36  
37  
38  
39  
40  
41  
42  
43  
44  
45  
46  
47  
48  
49  
50  
51  
52  
53  
54  
55  
56  
57  
58  
59  
60

For peer review only

Table 2. Bivariate comparison of demographics and general health characteristics in diagnosed migraine patients and patients currently taking Rx vs. patients not currently taking Rx (non-Rx).

|                                                       |                                | Diagnosed migraine patients<br>(N=1,265) |             | Non-Rx<br>(N=678) |             | Rx<br>(N=587) |             | p-value<br>No Rx vs.<br>Rx |
|-------------------------------------------------------|--------------------------------|------------------------------------------|-------------|-------------------|-------------|---------------|-------------|----------------------------|
|                                                       |                                | Mean or %                                | [SD] or (n) | Mean or %         | [SD] or (n) | Mean or %     | [SD] or (n) |                            |
| <b>Age, mean [SD]</b>                                 |                                | 43.79                                    | [14.27]     | 44.06             | [14.82]     | 43.47         | [13.61]     | .463                       |
| <b>Gender, % (n)</b>                                  | Female                         | 66.6%                                    | (842)       | 64.9%             | (440)       | 68.5%         | (402)       | .177                       |
| <b>Marital status, % (n)</b>                          | Married or living with partner | 53.1%                                    | (672)       | 58.4%             | (396)       | 47.0%         | (276)       | < .001                     |
| <b>Having children &lt;18 in the household, % (n)</b> | Yes                            | 27.7%                                    | (351)       | 27.7%             | (188)       | 27.8%         | (163)       | .987                       |
| <b>Employment status, % (n)</b>                       | Currently employed             | 59.8%                                    | (756)       | 60.0%             | (407)       | 59.5%         | (349)       | .835                       |
| <b>Household income, % (n)</b>                        | <¥3,000,000                    | 18.7%                                    | (237)       | 18.4%             | (125)       | 19.1%         | (112)       | .318                       |
|                                                       | ¥3,000,000 to <¥5,000,000      | 25.0%                                    | (316)       | 24.2%             | (164)       | 25.9%         | (152)       |                            |
|                                                       | ¥5,000,000 to <¥8,000,000      | 24.6%                                    | (311)       | 26.0%             | (176)       | 23.0%         | (135)       |                            |
|                                                       | ¥8,000,000 or more             | 17.0%                                    | (215)       | 18.1%             | (123)       | 15.7%         | (92)        |                            |
|                                                       | decline to answer              | 14.7%                                    | (186)       | 13.3%             | (90)        | 16.4%         | (96)        |                            |
| <b>CCI, mean [SD]</b>                                 |                                | 0.24                                     | [1.00]      | 0.19              | [0.60]      | 0.29          | [1.32]      | .072                       |
| <b>Currently smoking, % (n)</b>                       | Yes                            | 44.0%                                    | (557)       | 43.8%             | (297)       | 44.3%         | (260)       | .862                       |
| <b>Currently use alcohol, % (n)</b>                   | Yes                            | 63.2%                                    | (800)       | 64.9%             | (440)       | 61.3%         | (360)       | .189                       |
| <b>Currently exercise, % (n)</b>                      | Yes                            | 44.3%                                    | (561)       | 43.4%             | (294)       | 45.5%         | (267)       | .449                       |

Abbreviations: CCI = Charlson Comorbidity Index, Rx = prescribed medication

## DISCUSSION

In this study we found that migraine patients in Japan experience a significant burden of illness compared to matched controls without migraine in terms of lower HRQoL, higher WPAI and HCRU (Figure 2), and 88.8% of patients reported that migraine had a moderate to severe impact on their daily life (HIT-6 score) (Table 1). Compared to matched controls, migraine patients had 2.93 points decreased PCS ( $p<0.001$ ) and more than 3 points decreased MCS (3.66 points,  $p<0.001$ ) and RCS (4.40 points,  $p<0.001$ ) (Figure 2), which indicates that migraine has a clinically significant impact on migraine patients' mental health and role/social functioning. In comparison, similarly lower MCS scores have been reported in Japanese patients with arthritis (-3.4 points) and ischemic heart disease (-4.1) compared to controls, and similarly lower PCS scores were reported in patients with diabetes (-3.0 point), chronic lung disease (-3.1 point) and ischemic heart disease (-2.6 points)[29].

In addition to lower HRQoL, we observed that migraine patients who were currently employed had higher levels of work productivity loss compared to matched non-migraine controls, with 2.2-fold higher absenteeism ( $p<0.001$ ), 1.7-fold higher presenteeism ( $p<0.001$ ) and 1.7-fold higher work productivity loss ( $p<0.001$ ) (Figure 2). The actual work loss that Japanese migraine patients experience was thereby quantified based on the validated WPAI tool[24], and supports the previous findings that migraine can cause a substantial loss of work productivity[7–9,12].

The finding in this current study that 74% of surveyed participants who reported ever having experienced migraine had not received a physician diagnosis of migraine indicates a large population of underdiagnosed migraine patients in Japan. This is supported by other studies showing that large proportions of migraine sufferers never consulted a physician[7,8].

Additionally, in this study we found that more than half of the diagnosed migraine patients (53.6%) were currently not receiving treatment with prescribed medication (non-Rx) (Figure



1  
2  
3 1). However, 56.6% of non-Rx had previously received treatment which indicates a high  
4 treatment discontinuation rate which is supported by the previous study by Meyers et al.  
5 where 62.2% discontinued prophylactic treatment after an average of 61.2 days[30]. Also,  
6  
7 43.4% of non-Rx patients have not previously received prescription medication which  
8 reflects an unmet need for treatment. Other studies have similarly described that 30 – 60% of  
9  
10 migraine patients had never received prescription of preventive therapy[31], and that lack of  
11 efficacy and side effects were the most common reasons for discontinuation of both acute and  
12 preventive therapy[31–34]. A recent study reported that among Japanese migraine patients  
13 who visited HCPs, lack of efficacy with both preventive (anticonvulsants and calcium  
14 antagonist) and acute treatment (triptans and NSAIDs) was experienced by half and a third of  
15 the patients, respectively[31].  
16  
17

18  
19  
20  
21  
22  
23  
24  
25  
26  
27  
28  
29  
30  
31  
32  
33  
34  
35  
36  
37  
38  
39  
40  
41  
42  
43  
44  
45  
46  
47  
48  
49  
50  
51  
52  
53  
54  
55  
56  
57  
58  
59  
60

Migraine patients currently taking prescribed medication (Rx) had significantly worse migraine-related characteristics compared to migraine patients currently not taking any Rx (Table 1, Figure 3). This indicates that those taking Rx suffer from more severe migraine. Interestingly, migraine patients receiving Rx suffer similar impairment of HRQoL and work productivity as non-Rx patients (Figure 2). This indicates that despite currently available preventive and acute treatments for migraine[6,10], there is an unmet need for improved HRQoL and work productivity among migraine patients, implying that current treatments have limited effects on these outcomes for patients. Additionally, only 14.3% of patients currently taking Rx received preventive treatments for migraine, indicating a lack of prescription of preventive therapy. These are important factors to consider for future treatment development.

The limitations of the study should be recognized. The data from NHWS is cross-sectional and no causal relationships can be assumed. As all data are self-reported, no verification of migraine diagnosis or patient reported outcomes was conducted, and data is subject to recall

1  
2  
3 bias. Although NHWS is broadly representative of the Japanese adult population, it is unclear  
4  
5 the extent to which the migraine patients and migraine patients taking Rx are representative  
6  
7 of the larger population. Due to the design of the survey, the reasons for not taking Rx or for  
8  
9 discontinuation of Rx (e.g. less migraine episodes or lack of efficacy) were not reported and  
10  
11 could not be concluded. Also, NWHS primarily relied upon respondents with Internet access  
12  
13 and these patients could potentially be different from the broader population (e.g., more  
14  
15 knowledgeable or engaged in their healthcare).  
16  
17  
18  
19  
20  
21  
22

## 23 **CONCLUSION**

24  
25 Migraine patients in Japan experience a significant burden of illness with decreased HRQoL,  
26  
27 around 2-fold increased work productivity loss and twice as many visits to HCPs compared to  
28  
29 non-migraine controls. There is a large proportion of both underdiagnosed and undertreated  
30  
31 migraine patients. The migraine patients not receiving prescribed medication for treatment of  
32  
33 their disease suffer similarly decreased HRQoL and high levels of work productivity loss as  
34  
35 patients currently receiving prescribed medication. These results indicate an unmet need for  
36  
37 improved HRQoL and work productivity in Japanese migraine patients despite the currently  
38  
39 available prescription medications, which are important factors to consider for future  
40  
41 development of migraine therapies.  
42  
43  
44  
45  
46  
47  
48  
49  
50  
51  
52  
53  
54  
55  
56  
57  
58  
59  
60

## **AUTHOR CONTRIBUTIONS**

HI, KU and TN conceptualized the study and analysed and interpreted the data. SJ, ZC and YC designed the analysis plan, conducted the analyses and interpreted the data. All authors revised the manuscript drafts for intellectual content and edited the manuscript. All authors reviewed and approved the final draft.

## **ACKNOWLEDGEMENTS**

The authors would like to acknowledge Dina Graae Kristensen at Graae MediWrite, for the medical writing support provided, including development, editing and proofreading of the manuscript.

## **COMPETING INTEREST**

Hisaka Igarashi reports personal fees for consulting, lectures, and speaker's honorarium from Pfizer, Eisai, Otsuka Pharmaceutical, Kyowa Kirin, Takeda Pharmaceutical, Astellas Amgen BioPharma, and Eli Lilly, outside the submitted work. Kaname Ueda, Tomomi Nakamura and Zhihong Cai are full-time employees of Eli Lilly Japan K.K. and shareholders of Eli Lilly & Company. Sungeun Jung and Yirong Chen are full-time employees of Kantar, Health Division.

## **FUNDING**

This research was funded by Eli Lilly Japan K.K.

## **PATIENT CONSENT FOR PUBLICATION**

Not required

1  
2  
3 **ETHIS APPROVAL**  
4

5  
6 NHWS was granted exemption status upon review by Pearl International Review Board  
7  
8 (Indianapolis, IN).  
9

10  
11 **DATA SHARING STATEMENT**  
12

13  
14 Data are available upon reasonable request.  
15  
16  
17  
18  
19  
20  
21  
22  
23  
24  
25  
26  
27  
28  
29  
30  
31  
32  
33  
34  
35  
36  
37  
38  
39  
40  
41  
42  
43  
44  
45  
46  
47  
48  
49  
50  
51  
52  
53  
54  
55  
56  
57  
58  
59  
60

For peer review only

## REFERENCES

- 1 Vo P, Fang J, Bilitou A, *et al.* Patients' perspective on the burden of migraine in Europe: a cross-sectional analysis of survey data in France, Germany, Italy, Spain, and the United Kingdom. *J Headache Pain* 2018;**19**:82. doi:10.1186/s10194-018-0907-6
- 2 Yao C, Wang Y, Wang L, *et al.* Burden of headache disorders in China, 1990-2017: findings from the Global Burden of Disease Study 2017. *J Headache Pain* 2019;**20**:102. doi:10.1186/s10194-019-1048-2
- 3 Headache Classification Committee of the International Headache Society (IHS) The International Classification of Headache Disorders, 3rd edition. *Cephalalgia Int J Headache* 2018;**38**:1–211. doi:10.1177/0333102417738202
- 4 GBD 2016 Disease and Injury Incidence and Prevalence Collaborators. Global, regional, and national incidence, prevalence, and years lived with disability for 328 diseases and injuries for 195 countries, 1990-2016: a systematic analysis for the Global Burden of Disease Study 2016. *Lancet Lond Engl* 2017;**390**:1211–59. doi:10.1016/S0140-6736(17)32154-2
- 5 Woldeamanuel YW, Cowan RP. Migraine affects 1 in 10 people worldwide featuring recent rise: A systematic review and meta-analysis of community-based studies involving 6 million participants. *J Neurol Sci* 2017;**372**:307–15. doi:10.1016/j.jns.2016.11.071
- 6 Takeshima T, Wan Q, Zhang Y, *et al.* Prevalence, burden, and clinical management of migraine in China, Japan, and South Korea: a comprehensive review of the literature. *J Headache Pain* 2019;**20**:111. doi:10.1186/s10194-019-1062-4
- 7 Sakai F, Igarashi H. Prevalence of migraine in Japan: a nationwide survey. *Cephalalgia Int J Headache* 1997;**17**:15–22. doi:10.1046/j.1468-2982.1997.1701015.x
- 8 Takeshima T, Ishizaki K, Fukuhara Y, *et al.* Population-based door-to-door survey of migraine in Japan: the Daisen study. *Headache* 2004;**44**:8–19. doi:10.1111/j.1526-4610.2004.04004.x
- 9 Suzuki N, Ishikawa Y, Gomi S, *et al.* Prevalence and characteristics of headaches in a socially active population working in the Tokyo metropolitan area -surveillance by an industrial health consortium. *Intern Med* 2014;**53**:683–9. doi:10.2169/internalmedicine.53.1700
- 10 Martelletti P, Schwedt TJ, Lanteri-Minet M, *et al.* My Migraine Voice survey: a global study of disease burden among individuals with migraine for whom preventive treatments have failed. *J Headache Pain* 2018;**19**:115. doi:10.1186/s10194-018-0946-z
- 11 Negro A, Sciattella P, Rossi D, *et al.* Cost of chronic and episodic migraine patients in continuous treatment for two years in a tertiary level headache Centre. *J Headache Pain* 2019;**20**:120. doi:10.1186/s10194-019-1068-y
- 12 WADA K, ARAKIDA M, WATANABE R, *et al.* The Economic Impact of Loss of Performance Due to Absenteeism and Presenteeism Caused by Depressive Symptoms

- 1  
2  
3 and Comorbid Health Conditions among Japanese Workers. *Ind Health* 2013;**51**:482–9.  
4 doi:10.2486/indhealth.2013-0016  
5  
6  
7 13 United States Census Bureau. International Data Base. [https://www.census.gov/data-](https://www.census.gov/data-tools/demo/idb/informationGateway.php)  
8 [tools/demo/idb/informationGateway.php](https://www.census.gov/data-tools/demo/idb/informationGateway.php)  
9  
10 14 Bolge SC, Doan JF, Kannan H, *et al.* Association of insomnia with quality of life, work  
11 productivity, and activity impairment. *Qual Life Res Int J Qual Life Asp Treat Care Rehabil* 2009;**18**:415–22. doi:10.1007/s11136-009-9462-6  
12  
13  
14 15 DiBonaventura MD, Wagner J-S, Yuan Y, *et al.* Humanistic and economic impacts of  
15 hepatitis C infection in the United States. *J Med Econ* 2010;**13**:709–18.  
16 doi:10.3111/13696998.2010.535576  
17  
18  
19 16 Charlson ME, Pompei P, Ales KL, *et al.* A new method of classifying prognostic  
20 comorbidity in longitudinal studies: development and validation. *J Chronic Dis*  
21 1987;**40**:373–83.  
22  
23  
24 17 Charlson ME, Charlson RE, Peterson JC, *et al.* The Charlson comorbidity index is  
25 adapted to predict costs of chronic disease in primary care patients. *J Clin Epidemiol*  
26 2008;**61**:1234–40. doi:10.1016/j.jclinepi.2008.01.006  
27  
28  
29 18 Quan H, Li B, Couris CM, *et al.* Updating and validating the Charlson comorbidity index  
30 and score for risk adjustment in hospital discharge abstracts using data from 6 countries.  
31 *Am J Epidemiol* 2011;**173**:676–82. doi:10.1093/aje/kwq433  
32  
33  
34 19 Brazier JE, Roberts J. The Estimation of a Preference-Based Measure of Health From the  
35 SF-12: *Med Care* 2004;**42**:851–9. doi:10.1097/01.mlr.0000135827.18610.0d  
36  
37  
38 20 Fukuhara S, Bito S, Green J, *et al.* Translation, adaptation, and validation of the SF-36  
39 Health Survey for use in Japan. *J Clin Epidemiol* 1998;**51**:1037–44. doi:10.1016/s0895-  
40 4356(98)00095-x  
41  
42  
43 21 Fukuhara S, Ware JE, Kosinski M, *et al.* Psychometric and clinical tests of validity of the  
44 Japanese SF-36 Health Survey. *J Clin Epidemiol* 1998;**51**:1045–53. doi:10.1016/s0895-  
45 4356(98)00096-1  
46  
47  
48 22 EuroQol - a new facility for the measurement of health-related quality of life. *Health*  
49 *Policy* 1990;**16**:199–208. doi:10.1016/0168-8510(90)90421-9  
50  
51  
52 23 Shiroywa T, Fukuda T, Ikeda S, *et al.* Japanese population norms for preference-based  
53 measures: EQ-5D-3L, EQ-5D-5L, and SF-6D. *Qual Life Res* 2016;**25**:707–19.  
54 doi:10.1007/s11136-015-1108-2  
55  
56  
57 24 Reilly MC, Gooch KL, Wong RL, *et al.* Validity, reliability and responsiveness of the  
58 Work Productivity and Activity Impairment Questionnaire in ankylosing spondylitis.  
59 *Rheumatol Oxf Engl* 2010;**49**:812–9. doi:10.1093/rheumatology/kep457  
60  
61  
62 25 Kosinski M, Bayliss MS, Bjorner JB, *et al.* A six-item short-form survey for measuring  
63 headache impact: the HIT-6. *Qual Life Res Int J Qual Life Asp Treat Care Rehabil*  
64 2003;**12**:963–74. doi:10.1023/a:1026119331193

- 1  
2  
3 26 IBM SPSS Statistics for Windows, Version 22.0. IBM Corp 2013.  
4  
5 27 R Core Team. *R: A language and environment for statistical computing*. Vienna,  
6 Austria: : R Foundation for Statistical Computing 2018. <https://www.R-project.org/>  
7  
8 28 Maruish ME. *User's Manual for the SF-36v2 Health Survey*. 3rd ed. Quality Metric  
9 Incorporated 2011.  
10  
11 29 Alonso J, Ferrer M, Gandek B, *et al*. Health-related quality of life associated with chronic  
12 conditions in eight countries: Results from the International Quality of Life Assessment  
13 (IQOLA) Project. *Qual Life Res* 2004;**13**:283–98.  
14 doi:10.1023/B:QURE.0000018472.46236.05  
15  
16 30 Meyers JL, Davis KL, Lenz RA, *et al*. Treatment patterns and characteristics of patients  
17 with migraine in Japan: A retrospective analysis of health insurance claims data.  
18 *Cephalalgia* 2019;**39**:1518–34. doi:10.1177/0333102419851855  
19  
20 31 Ueda K, Ye W, Lombard L, *et al*. Real-world treatment patterns and patient-reported  
21 outcomes in episodic and chronic migraine in Japan: analysis of data from the Adelphi  
22 migraine disease specific programme. *J Headache Pain* 2019;**20**:68. doi:10.1186/s10194-  
23 019-1012-1  
24  
25 32 Lipton RB, Hutchinson S, Ailani J, *et al*. Discontinuation of Acute Prescription  
26 Medication for Migraine: Results From the Chronic Migraine Epidemiology and  
27 Outcomes (CaMEO) Study. *Headache J Head Face Pain* 2019;**59**:1762–72.  
28 doi:10.1111/head.13642  
29  
30 33 Wells RE, Markowitz SY, Baron EP, *et al*. Identifying the Factors Underlying  
31 Discontinuation of Triptans. *Headache* 2014;**54**:278–89. doi:10.1111/head.12198  
32  
33 34 Blumenfeld AM, Bloudek LM, Becker WJ, *et al*. Patterns of Use and Reasons for  
34 Discontinuation of Prophylactic Medications for Episodic Migraine and Chronic  
35 Migraine: Results From the Second International Burden of Migraine Study (IBMS-II).  
36 *Headache J Head Face Pain* 2013;**53**:644–55. doi:10.1111/head.12055  
37  
38  
39  
40  
41  
42  
43  
44  
45  
46  
47  
48  
49  
50  
51  
52  
53  
54  
55  
56  
57  
58  
59  
60

## FIGURE LEGENDS

### Figure 1. Respondent flow chart

*Abbreviations: NHWS = National Health and Wellness Survey, Rx = prescription medication*

### Figure 2. Comparison of health outcomes between migraine patients and matched non-migraine respondents (A-C), and between migraine patients currently taking Rx and not currently taking Rx (D-F)

*A-C: Migraine patients and matched non-migraine respondents: Bivariate analysis for comparison of health outcomes between migraine patients and matched non-migraine respondents. D-F: Migraine patients currently taking prescription medication (Rx) and migraine patients not currently taking Rx: Adjusted means from GLM analysis for comparison of health outcomes between migraine patients currently taking prescription medication (Rx) and migraine patients not currently taking Rx.*

*Abbreviations: Rx = prescription medication, HRQoL = Health-related quality of life, PCS = physical component summary score, MCS = mental component summary score, RCS = role/social component summary score, EQ-5D = EuroQol-5 Dimension, WPAI = Work Productivity and Activity Impairment, HCRU = healthcare resource utilization, ER = emergency room.*

### Figure 3. Migraine-related symptoms

*Abbreviations: Rx = patients currently taking prescription medication, non-Rx = patients currently not taking prescription medication*



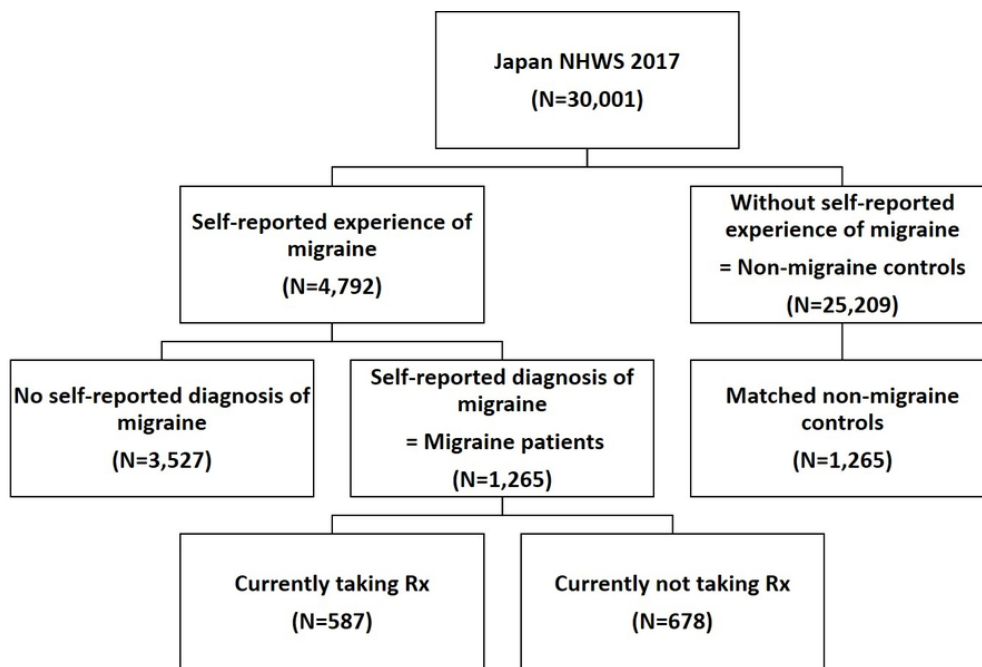

Figure 1. Respondent flow chart  
Abbreviations: NHWS = National Health and Wellness Survey, Rx = prescription medication

75x50mm (300 x 300 DPI)

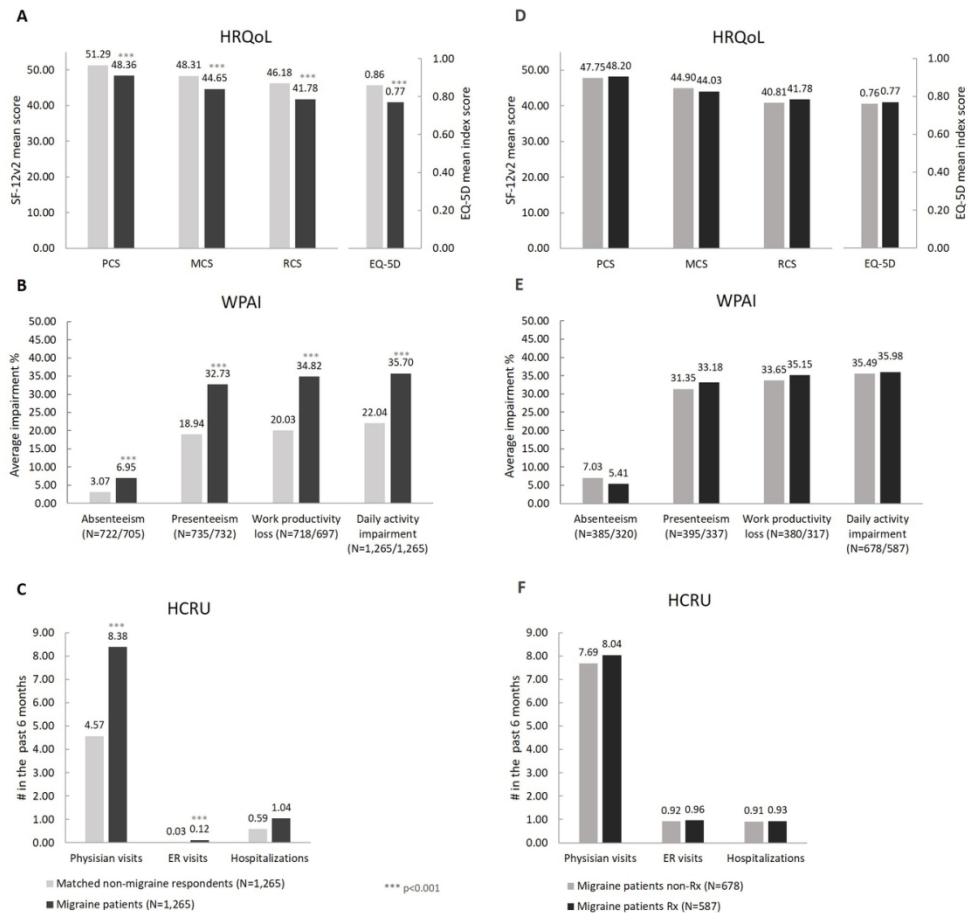

Figure 2. Comparison of health outcomes between migraine patients and matched non-migraine respondents (A-C), and between migraine patients currently taking Rx and not currently taking Rx (D-F)  
 A-C: Migraine patients and matched non-migraine respondents: Bivariate analysis for comparison of health outcomes between migraine patients and matched non-migraine respondents. D-F: Migraine patients currently taking prescription medication (Rx) and migraine patients not currently taking Rx: Adjusted means from GLM analysis for comparison of health outcomes between migraine patients currently taking prescription medication (Rx) and migraine patients not currently taking Rx.  
 Abbreviations: Rx = prescription medication, HRQoL = Health-related quality of life, PCS = physical component summary score, MCS = mental component summary score, RCS = role/social component summary score, EQ-5D = EuroQol-5 Dimension, WPAI = Work Productivity and Activity Impairment, HCRU = healthcare resource utilization, ER = emergency room.

116x110mm (300 x 300 DPI)

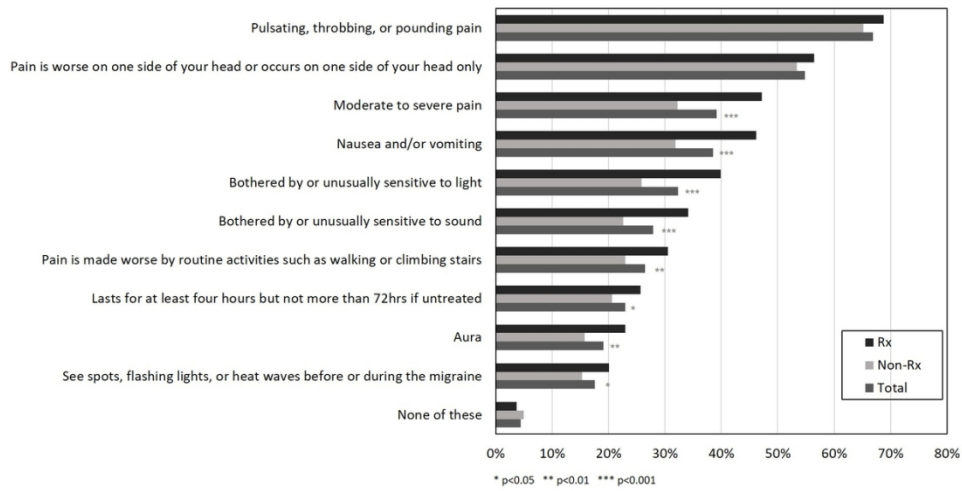

Figure 3. Migraine-related symptoms

Abbreviations: Rx = patients currently taking prescription medication, non-Rx = patients currently not taking prescription medication

111x56mm (300 x 300 DPI)

Supplementary Table 1. Bivariate comparison of demographic and health characteristics between respondents with no experience of migraine (non-migraine), patients diagnosed with migraine and matched non-migraine respondents.

|                                     |                           | Non-migraine<br>(N=25,209) |             | Matched Non-migraine<br>(N=1,265) |             | Diagnosed migraine<br>(N=1,265) |             | p-value                       | p-value                  |
|-------------------------------------|---------------------------|----------------------------|-------------|-----------------------------------|-------------|---------------------------------|-------------|-------------------------------|--------------------------|
|                                     |                           | Mean or %                  | [SD] or (n) | Mean or %                         | [SD] or (n) | Mean or %                       | [SD] or (n) | Non-migraine<br>vs. Diagnosed | Matched vs.<br>Diagnosed |
| <b>Age, mean [SD]</b>               |                           | 52.80                      | [16.53]     | 43.45                             | [14.59]     | 43.79                           | [14.27]     | < .001                        | .559                     |
| <b>CCI, mean [SD]</b>               |                           | 0.17                       | [0.53]      | 0.18                              | [1.05]      | 0.24                            | [1.00]      | < .001                        | .117                     |
| <b>Gender, % (n)</b>                | Female                    | 47.1%                      | (11,861)    | 67.4%                             | (852)       | 66.6%                           | (842)       | < .001                        | .673                     |
| <b>Employment status, % (n)</b>     | Currently employed        | 54.7%                      | (13,801)    | 60.1%                             | (760)       | 59.8%                           | (756)       | < .001                        | .871                     |
| <b>Household income, % (n)</b>      | <¥3,000,000               | 18.3%                      | (4623)      | 17.9%                             | (227)       | 18.7%                           | (237)       | .683                          | .948                     |
|                                     | ¥3,000,000 to <¥5,000,000 | 24.4%                      | (6154)      | 24.5%                             | (310)       | 25.0%                           | (316)       |                               |                          |
|                                     | ¥5,000,000 to <¥8,000,000 | 23.9%                      | (6027)      | 25.9%                             | (328)       | 24.6%                           | (311)       |                               |                          |
|                                     | ¥8,000,000 or more        | 18.7%                      | (4704)      | 16.9%                             | (214)       | 17.0%                           | (215)       |                               |                          |
|                                     | decline to answer         | 14.7%                      | (3701)      | 14.7%                             | (186)       | 14.7%                           | (186)       |                               |                          |
| <b>Currently smoking, % (n)</b>     | Yes                       | 41.2%                      | (10,385)    | 44.3%                             | (561)       | 44.0%                           | (557)       | .046                          | .873                     |
| <b>Currently use alcohol, % (n)</b> | Yes                       | 66.2%                      | (16,685)    | 63.0%                             | (797)       | 63.2%                           | (800)       | .031                          | .902                     |

Abbreviations: CCI = Charlson Comorbidity Index

Supplementary Table 2. Unadjusted bivariate comparison of health outcomes between migraine patients currently taking Rx and migraine patients not currently taking Rx

| Outcomes                                          | Non-Rx<br>(N=678) |       | Rx<br>(N=587) |       | p-values |
|---------------------------------------------------|-------------------|-------|---------------|-------|----------|
|                                                   | Mean              | SD    | Mean          | SD    |          |
| <b>HRQoL</b>                                      |                   |       |               |       |          |
| SF-12v2: PCS                                      | 48.70             | 12.42 | 47.96         | 12.16 | .290     |
| SF-12v2: MCS                                      | 45.26             | 10.13 | 43.95         | 10.24 | .022     |
| SF-12v2: RCS                                      | 41.93             | 14.40 | 41.61         | 15.40 | .703     |
| EQ-5D index score                                 | .77               | .16   | .76           | .16   | .255     |
| EQ-5D VAS                                         | 65.33             | 23.11 | 63.35         | 23.95 | .134     |
| <b>WPAI</b>                                       |                   |       |               |       |          |
| Absenteeism %*                                    | 7.10              | 17.71 | 6.76          | 16.98 | .795     |
| Presenteeism %**                                  | 31.01             | 26.60 | 34.75         | 27.52 | .063     |
| Work Productivity Loss %***                       | 33.27             | 28.78 | 36.68         | 28.84 | .119     |
| Daily Activity Impairment %                       | 34.07             | 27.52 | 37.58         | 28.28 | .026     |
| <b>HCRU</b>                                       |                   |       |               |       |          |
| Number of physician visits in the past 6 months   | 7.52              | 10.05 | 9.37          | 16.16 | .013     |
| Number of ER visits in the past 6 months          | .13               | .62   | .10           | .71   | .515     |
| Number of times hospitalized in the past 6 months | .98               | 4.71  | 1.11          | 8.85  | .738     |

Abbreviations: Rx = prescription medication, SD = standard deviation, HRQoL = Health-related quality of life, SF-12v2 = Short Form 12 health survey version 2, PCS = physical component summary score, MCS = mental component summary score, RCS = role/social component summary score, EQ-5D = EuroQol 5-Dimension, WPAI = Work Productivity and Activity Impairment, HCRU = healthcare resource utilization, ER = emergency room

\*Sample size of Non-Rx: N=385, Rx: N=320. \*\*Sample size of Non-Rx: N=395, Rx: N=337. \*\*\*Sample size of Non-Rx: N=380 Rx: N=317.

**pSTROBE 2007 (v4) Statement—Checklist of items that should be included in reports of *cross-sectional studies***

| Section/Topic                | Item # | Recommendation                                                                                                                                                                       | Reported on page # |
|------------------------------|--------|--------------------------------------------------------------------------------------------------------------------------------------------------------------------------------------|--------------------|
| <b>Title and abstract</b>    | 1      | (a) Indicate the study's design with a commonly used term in the title or the abstract                                                                                               | Page 1             |
|                              |        | (b) Provide in the abstract an informative and balanced summary of what was done and what was found                                                                                  | Page 2             |
| <b>Introduction</b>          |        |                                                                                                                                                                                      |                    |
| Background/rationale         | 2      | Explain the scientific background and rationale for the investigation being reported                                                                                                 | Page 4-5           |
| Objectives                   | 3      | State specific objectives, including any prespecified hypotheses                                                                                                                     | Page 5             |
| <b>Methods</b>               |        |                                                                                                                                                                                      |                    |
| Study design                 | 4      | Present key elements of study design early in the paper                                                                                                                              | Page 5             |
| Setting                      | 5      | Describe the setting, locations, and relevant dates, including periods of recruitment, exposure, follow-up, and data collection                                                      | Page 5-6           |
| Participants                 | 6      | (a) Give the eligibility criteria, and the sources and methods of selection of participants                                                                                          | Page 5-6           |
| Variables                    | 7      | Clearly define all outcomes, exposures, predictors, potential confounders, and effect modifiers. Give diagnostic criteria, if applicable                                             | Page 6-8           |
| Data sources/<br>measurement | 8*     | For each variable of interest, give sources of data and details of methods of assessment (measurement). Describe comparability of assessment methods if there is more than one group | Page 6-8           |
| Bias                         | 9      | Describe any efforts to address potential sources of bias                                                                                                                            | Not applicable     |
| Study size                   | 10     | Explain how the study size was arrived at                                                                                                                                            | Not applicable     |
| Quantitative variables       | 11     | Explain how quantitative variables were handled in the analyses. If applicable, describe which groupings were chosen and why                                                         | Page 6-9           |
| Statistical methods          | 12     | (a) Describe all statistical methods, including those used to control for confounding                                                                                                | Page 8-9           |
|                              |        | (b) Describe any methods used to examine subgroups and interactions                                                                                                                  | Page 9             |
|                              |        | (c) Explain how missing data were addressed                                                                                                                                          | Not applicable     |
|                              |        | (d) If applicable, describe analytical methods taking account of sampling strategy                                                                                                   | Not applicable     |
|                              |        | (e) Describe any sensitivity analyses                                                                                                                                                | Not applicable     |
| <b>Results</b>               |        |                                                                                                                                                                                      |                    |

|                          |     |                                                                                                                                                                                                              |                                     |
|--------------------------|-----|--------------------------------------------------------------------------------------------------------------------------------------------------------------------------------------------------------------|-------------------------------------|
| Participants             | 13* | (a) Report numbers of individuals at each stage of study—eg numbers potentially eligible, examined for eligibility, confirmed eligible, included in the study, completing follow-up, and analysed            | Page 10                             |
|                          |     | (b) Give reasons for non-participation at each stage                                                                                                                                                         | Not applicable                      |
|                          |     | (c) Consider use of a flow diagram                                                                                                                                                                           | Page 10                             |
| Descriptive data         | 14* | (a) Give characteristics of study participants (eg demographic, clinical, social) and information on exposures and potential confounders                                                                     | Page 10                             |
|                          |     | (b) Indicate number of participants with missing data for each variable of interest                                                                                                                          | Table 1                             |
| Outcome data             | 15* | Report numbers of outcome events or summary measures                                                                                                                                                         |                                     |
| Main results             | 16  | (a) Give unadjusted estimates and, if applicable, confounder-adjusted estimates and their precision (eg, 95% confidence interval). Make clear which confounders were adjusted for and why they were included | Supplementary table 1, and page 8-9 |
|                          |     | (b) Report category boundaries when continuous variables were categorized                                                                                                                                    | Not applicable                      |
|                          |     | (c) If relevant, consider translating estimates of relative risk into absolute risk for a meaningful time period                                                                                             | Not applicable                      |
| Other analyses           | 17  | Report other analyses done—eg analyses of subgroups and interactions, and sensitivity analyses                                                                                                               | Page 11-16                          |
| <b>Discussion</b>        |     |                                                                                                                                                                                                              |                                     |
| Key results              | 18  | Summarise key results with reference to study objectives                                                                                                                                                     | Page 18                             |
| Limitations              | 19  | Discuss limitations of the study, taking into account sources of potential bias or imprecision. Discuss both direction and magnitude of any potential bias                                                   | Page 19-20                          |
| Interpretation           | 20  | Give a cautious overall interpretation of results considering objectives, limitations, multiplicity of analyses, results from similar studies, and other relevant evidence                                   | Page 18-19                          |
| Generalisability         | 21  | Discuss the generalisability (external validity) of the study results                                                                                                                                        | Page 20                             |
| <b>Other information</b> |     |                                                                                                                                                                                                              |                                     |
| Funding                  | 22  | Give the source of funding and the role of the funders for the present study and, if applicable, for the original study on which the present article is based                                                | Page 21                             |

\*Give information separately for cases and controls in case-control studies and, if applicable, for exposed and unexposed groups in cohort and cross-sectional studies.

**Note:** An Explanation and Elaboration article discusses each checklist item and gives methodological background and published examples of transparent reporting. The STROBE checklist is best used in conjunction with this article (freely available on the Web sites of PLoS Medicine at <http://www.plosmedicine.org/>, Annals of Internal Medicine at <http://www.annals.org/>, and Epidemiology at <http://www.epidem.com/>). Information on the STROBE Initiative is available at [www.strobe-statement.org](http://www.strobe-statement.org).
