# Supplementary material for: Social burden of people with the migraine diagnosis in Japan: evidence from a population-based cross-sectional survey
Source: PubMed Central journal article supplement — BMJ Open. 2020 Nov 9;10(11):e038987. doi: 10.1136/bmjopen-2020-038987 (PMC7654137; doi:10.1136/bmjopen-2020-038987), 2020-11-09
Supplement: bmjopen-2020-038987supp001.pdf [file bmjopen-2020-038987supp001.pdf]

Supplementary Table 1. Bivariate comparison of demographic and health characteristics between respondents with no experience of migraine (non-migraine), patients diagnosed with migraine and matched non-migraine respondents.

|                                     |                           | Non-migraine<br>(N=25,209) |             | Matched Non-migraine<br>(N=1,265) |             | Diagnosed migraine<br>(N=1,265) |             | p-value                       | p-value                  |
|-------------------------------------|---------------------------|----------------------------|-------------|-----------------------------------|-------------|---------------------------------|-------------|-------------------------------|--------------------------|
|                                     |                           | Mean or %                  | [SD] or (n) | Mean or %                         | [SD] or (n) | Mean or %                       | [SD] or (n) | Non-migraine<br>vs. Diagnosed | Matched vs.<br>Diagnosed |
| <b>Age, mean [SD]</b>               |                           | 52.80                      | [16.53]     | 43.45                             | [14.59]     | 43.79                           | [14.27]     | < .001                        | .559                     |
| <b>CCI, mean [SD]</b>               |                           | 0.17                       | [0.53]      | 0.18                              | [1.05]      | 0.24                            | [1.00]      | < .001                        | .117                     |
| <b>Gender, % (n)</b>                | Female                    | 47.1%                      | (11,861)    | 67.4%                             | (852)       | 66.6%                           | (842)       | < .001                        | .673                     |
| <b>Employment status, % (n)</b>     | Currently employed        | 54.7%                      | (13,801)    | 60.1%                             | (760)       | 59.8%                           | (756)       | < .001                        | .871                     |
| <b>Household income, % (n)</b>      | <¥3,000,000               | 18.3%                      | (4623)      | 17.9%                             | (227)       | 18.7%                           | (237)       | .683                          | .948                     |
|                                     | ¥3,000,000 to <¥5,000,000 | 24.4%                      | (6154)      | 24.5%                             | (310)       | 25.0%                           | (316)       |                               |                          |
|                                     | ¥5,000,000 to <¥8,000,000 | 23.9%                      | (6027)      | 25.9%                             | (328)       | 24.6%                           | (311)       |                               |                          |
|                                     | ¥8,000,000 or more        | 18.7%                      | (4704)      | 16.9%                             | (214)       | 17.0%                           | (215)       |                               |                          |
|                                     | decline to answer         | 14.7%                      | (3701)      | 14.7%                             | (186)       | 14.7%                           | (186)       |                               |                          |
| <b>Currently smoking, % (n)</b>     | Yes                       | 41.2%                      | (10,385)    | 44.3%                             | (561)       | 44.0%                           | (557)       | .046                          | .873                     |
| <b>Currently use alcohol, % (n)</b> | Yes                       | 66.2%                      | (16,685)    | 63.0%                             | (797)       | 63.2%                           | (800)       | .031                          | .902                     |

Abbreviations: CCI = Charlson Comorbidity Index
