# Supplementary material for: Social burden of people with the migraine diagnosis in Japan: evidence from a population-based cross-sectional survey
Source: PubMed Central journal article supplement — BMJ Open. 2020 Nov 9;10(11):e038987. doi: 10.1136/bmjopen-2020-038987 (PMC7654137; doi:10.1136/bmjopen-2020-038987), 2020-11-09
Supplement: bmjopen-2020-038987supp002.pdf [file bmjopen-2020-038987supp002.pdf]

Supplementary Table 2. Unadjusted bivariate comparison of health outcomes between migraine patients currently taking Rx and migraine patients not currently taking Rx

| Outcomes                                          | Non-Rx<br>(N=678) |       | Rx<br>(N=587) |       | p-values |
|---------------------------------------------------|-------------------|-------|---------------|-------|----------|
|                                                   | Mean              | SD    | Mean          | SD    |          |
| <b>HRQoL</b>                                      |                   |       |               |       |          |
| SF-12v2: PCS                                      | 48.70             | 12.42 | 47.96         | 12.16 | .290     |
| SF-12v2: MCS                                      | 45.26             | 10.13 | 43.95         | 10.24 | .022     |
| SF-12v2: RCS                                      | 41.93             | 14.40 | 41.61         | 15.40 | .703     |
| EQ-5D index score                                 | .77               | .16   | .76           | .16   | .255     |
| EQ-5D VAS                                         | 65.33             | 23.11 | 63.35         | 23.95 | .134     |
| <b>WPAI</b>                                       |                   |       |               |       |          |
| Absenteeism %*                                    | 7.10              | 17.71 | 6.76          | 16.98 | .795     |
| Presenteeism %**                                  | 31.01             | 26.60 | 34.75         | 27.52 | .063     |
| Work Productivity Loss %***                       | 33.27             | 28.78 | 36.68         | 28.84 | .119     |
| Daily Activity Impairment %                       | 34.07             | 27.52 | 37.58         | 28.28 | .026     |
| <b>HCRU</b>                                       |                   |       |               |       |          |
| Number of physician visits in the past 6 months   | 7.52              | 10.05 | 9.37          | 16.16 | .013     |
| Number of ER visits in the past 6 months          | .13               | .62   | .10           | .71   | .515     |
| Number of times hospitalized in the past 6 months | .98               | 4.71  | 1.11          | 8.85  | .738     |

Abbreviations: Rx = prescription medication, SD = standard deviation, HRQoL = Health-related quality of life, SF-12v2 = Short Form 12 health survey version 2, PCS = physical component summary score, MCS = mental component summary score, RCS = role/social component summary score, EQ-5D = EuroQol 5-Dimension, WPAI = Work Productivity and Activity Impairment, HCRU = healthcare resource utilization, ER = emergency room

\*Sample size of Non-Rx: N=385, Rx: N=320. \*\*Sample size of Non-Rx: N=395, Rx: N=337. \*\*\*Sample size of Non-Rx: N=380 Rx: N=317.
